# Supplementary material for: Association between the Changes in Trimethylamine N-Oxide-Related Metabolites and Prognosis of Patients with Acute Myocardial Infarction: A Prospective Study
Source: MDPI journal article supplement (doi:10.3390/jcdd9110380), 2022-11-04
Supplement: s1 [file s1]

**Table S1.** Patient characteristics according to median and tertile levels of TMAO at enrollment.

| Variables                           | Total (n = 1203)       | Low (n = 601)          | High (n = 602)         | P-value |
|-------------------------------------|------------------------|------------------------|------------------------|---------|
| TMAO (μmol/L)                       | 6.6 (4.0, 11.6)        | 4.0 (2.8, 5.2)         | 11.6 (8.5, 17.6)       | < 0.001 |
| Demographics                        |                        |                        |                        |         |
| Male                                | 963 (80.0)             | 484 (80.5)             | 479 (79.6)             | 0.729   |
| Age (years)                         | 61.1 (53.0, 69.0)      | 60.0 (50.4, 67.0)      | 63.0 (55.0, 72.0)      | < 0.001 |
| BMI (kg/m <sup>2</sup> )            | 25.8 (23.4, 27.8)      | 25.7 (23.3, 27.7)      | 25.8 (23.4, 28.1)      | 0.152   |
| Killip (II- IV)                     | 153 (12.7)             | 59 (9.8)               | 94 (15.6)              | 0.003   |
| LVEF (%)                            | 55.0 (50.0, 60.0)      | 56.0 (52.0, 60.0)      | 55.0 (48.0, 59.0)      | 0.037   |
| LVEF < 40%                          | 68 (5.7)               | 28 (4.7)               | 40 (6.6)               | 0.172   |
| MVD                                 | 883 (73.4)             | 440 (73.2)             | 443 (73.6)             | 0.934   |
| PCI                                 | 833 (69.2)             | 419 (69.7)             | 414 (68.8)             | 0.769   |
| Medical history                     |                        |                        |                        |         |
| Current Smoker                      | 875 (72.7)             | 434 (72.2)             | 441 (73.3)             | 0.733   |
| Hypertension                        | 786 (65.3)             | 381 (63.4)             | 405 (67.3)             | 0.176   |
| Hyperlipemia                        | 1117 (92.9)            | 550 (91.5)             | 567 (94.2)             | 0.092   |
| Diabetes Mellitus                   | 416 (34.6)             | 170 (28.3)             | 246 (40.9)             | < 0.001 |
| Previous Stroke                     | 184 (15.3)             | 68 (11.3)              | 116 (19.3)             | < 0.001 |
| CKD                                 | 95 (7.9)               | 29 (4.8)               | 66 (11.0)              | < 0.001 |
| PAD                                 | 73 (6.1)               | 30 (5.0)               | 43 (7.1)               | 0.149   |
| Previous MI                         | 220 (18.3)             | 101 (16.8)             | 119 (19.8)             | 0.210   |
| Laboratory indexes                  |                        |                        |                        |         |
| Choline (μmol/L)                    | 1.2 (1.0, 1.5)         | 1.1 (0.9, 1.4)         | 1.2 (1.0, 1.6)         | < 0.001 |
| Betaine (μmol/L)                    | 1.9 (1.5, 2.4)         | 1.8 (1.4, 2.2)         | 2.0 (1.6, 2.5)         | < 0.001 |
| L-carnitine (μmol/L)                | 50.6 (42.5, 59.6)      | 49.5 (41.5, 58.6)      | 51.8 (43.5, 61.1)      | 0.003   |
| eGFR (ml/min/1.732m <sup>2</sup> *) | 76.1 (64.1, 89.4)      | 79.4 (68.9, 92.5)      | 72.3 (59.5, 85.4)      | < 0.001 |
| ALT (IU/L)                          | 32.0 (21.0, 52.0)      | 32.0 (21.0, 50.0)      | 33.0 (20.0, 56.0)      | 0.933   |
| AST (IU/L)                          | 90.0 (44.0, 191.0)     | 97.0 (43.8, 186.0)     | 84.0 (44.0, 195.0)     | 0.961   |
| Baseline cTnI (ng/mL)               | 1.0 (0.1, 5.5)         | 1.2 (0.1, 6.3)         | 0.8 (0.1, 4.5)         | 0.014   |
| Peak cTnI (ng/mL)                   | 9.6 (2.1, 27.2)        | 11.1 (3.0, 27.8)       | 8.6 (1.4, 26.7)        | 0.035   |
| Baseline NT-proBNP (ng/mL)          | 301.8 (83.1, 1007.0)   | 277.0 (76.8, 881.0)    | 329.6 (89.5, 1103.0)   | 0.073   |
| Peak NT-proBNP (ng/mL)              | 1186.0 (469.6, 2776.0) | 1075.0 (413.3, 2544.0) | 1287.0 (499.9, 2948.0) | 0.092   |
| hsCRP (mg/L)                        | 5.5 (1.8, 11.0)        | 6.2 (1.9, 11.2)        | 4.8 (1.7, 10.8)        | 0.022   |
| LDL-C (mmol/L)                      | 2.6 (2.0, 3.2)         | 2.7 (2.1, 3.3)         | 2.4 (1.8, 3.0)         | < 0.001 |
| GRACE score                         | 108.0 (89.0, 127.0)    | 105.0 (86.0, 123.0)    | 111.0 (93.0, 131.0)    | < 0.001 |
| Medication at discharge             |                        |                        |                        |         |
| Aspirin                             | 1142 (94.9)            | 578 (96.2)             | 564 (93.7)             | 0.063   |
| Ticagrelor                          | 565 (47.5)             | 307 (51.4)             | 258 (43.5)             | 0.007   |
| Clopidogrel                         | 607 (51.0)             | 281 (47.1)             | 326 (55.0)             | 0.008   |
| ACEI/ARB                            | 830 (69.7)             | 415 (69.5)             | 415 (70.0)             | 0.910   |
| Beta Blocker                        | 1008 (84.7)            | 516 (86.4)             | 492 (83.0)             | 0.114   |
| Statins                             | 1139 (95.7)            | 579 (97.0)             | 560 (94.4)             | 0.043   |
| Adverse outcomes                    |                        |                        |                        |         |
| Death                               | 84 (7.0)               | 31 (5.2)               | 53 (8.8)               | 0.018   |
| reMI                                | 71 (5.9)               | 24 (4.0)               | 47 (7.8)               | 0.007   |
| reHF                                | 22 (1.8)               | 8 (1.3)                | 14 (2.3)               | 0.284   |
| Revascularization                   | 195 (16.2)             | 89 (14.8)              | 106 (17.6)             | 0.215   |
| Stroke                              | 41 (3.4)               | 20 (3.3)               | 21 (3.5)               | 1.000   |
| MACE                                | 343 (28.5)             | 149 (24.8)             | 194 (32.2)             | 0.005   |
| Variables.                          | Tertile 1 (n = 401)    | Tertile 2 (n = 401)    | Tertile 3 (n = 401)    | P-value |

|                                     |                        |                        |                        |         |
|-------------------------------------|------------------------|------------------------|------------------------|---------|
| TMAO (μmol/L)                       | 3.2 (2.2, 4.0)         | 6.6 (5.6, 7.9)         | 15.1 (11.6, 22.5)      | < 0.001 |
| Demographics                        |                        |                        |                        |         |
| Male                                | 319 (79.6)             | 334 (83.3)             | 310 (77.3)             | 0.101   |
| Age (years)                         | 59.0 (50.5, 67.0)      | 61.0 (52.0, 68.0)      | 64.0 (56.0, 73.0)      | < 0.001 |
| BMI (kg/m <sup>2</sup> )            | 25.2 (23.1, 27.7)      | 25.8 (23.4, 28.0)      | 25.9 (23.5, 27.8)      | 0.093   |
| Killip (II- IV)                     | 36 (9.0)               | 42 (10.5)              | 75 (18.7)              | < 0.001 |
| LVEF (%)                            | 55.0 (52.0, 60.0)      | 56.0 (50.0, 60.0)      | 55.0 (48.0, 59.0)      | 0.135   |
| LVEF < 40%                          | 18 (4.5)               | 17 (4.2)               | 33 (8.2)               | 0.023   |
| MVD                                 | 287 (71.6)             | 291 (72.6)             | 305 (76.1)             | 0.319   |
| PCI                                 | 282 (70.3)             | 284 (70.8)             | 267 (66.6)             | 0.364   |
| Medical history                     |                        |                        |                        |         |
| Current Smoker                      | 282 (70.3)             | 308 (76.8)             | 285 (71.1)             | 0.079   |
| Hypertension                        | 261 (65.1)             | 257 (64.1)             | 268 (66.8)             | 0.711   |
| Hyperlipemia                        | 370 (92.3)             | 368 (91.8)             | 379 (94.5)             | 0.275   |
| Diabetes Mellitus                   | 109 (27.2)             | 129 (32.2)             | 178 (44.4)             | < 0.001 |
| Previous Stroke                     | 42 (10.5)              | 60 (15.0)              | 82 (20.4)              | < 0.001 |
| CKD                                 | 20 (5.0)               | 22 (5.5)               | 53 (13.2)              | < 0.001 |
| PAD                                 | 22 (5.5)               | 21 (5.2)               | 30 (7.5)               | 0.345   |
| Previous MI                         | 68 (17.0)              | 77 (19.2)              | 75 (18.7)              | 0.689   |
| Laboratory indexes                  |                        |                        |                        |         |
| Choline (μmol/L)                    | 1.1 (0.9, 1.3)         | 1.2 (1.0, 1.5)         | 1.3 (1.1, 1.6)         | < 0.001 |
| Betaine (μmol/L)                    | 1.8 (1.4, 2.2)         | 1.9 (1.6, 2.4)         | 2.0 (1.6, 2.5)         | < 0.001 |
| L-carnitine (μmol/L)                | 49.5 (41.2, 58.3)      | 49.7 (42.6, 59.0)      | 52.5 (43.5, 62.0)      | 0.002   |
| eGFR (ml/min/1.732m <sup>2*</sup> ) | 80.2 (70.2, 94.2)      | 77.0 (65.4, 89.7)      | 69.3 (56.6, 82.3)      | < 0.001 |
| ALT (IU/L)                          | 32.0 (21.5, 50.0)      | 33.0 (21.0, 52.0)      | 33.0 (19.0, 55.0)      | 0.875   |
| AST (IU/L)                          | 99.0 (44.0, 184.5)     | 90.0 (44.0, 194.8)     | 82.0 (44.0, 195.0)     | 0.982   |
| Baseline cTnI (ng/mL)               | 1.5 (0.1, 6.9)         | 1.0 (0.2, 5.1)         | 0.7 (0.1, 4.4)         | 0.008   |
| Peak cTnI (ng/mL)                   | 12.7 (3.6, 29.8)       | 7.5 (1.9, 24.3)        | 9.5 (1.4, 27.9)        | 0.004   |
| Baseline NT-proBNP (ng/mL)          | 296.7 (87.0, 904.2)    | 274.5 (77.0, 858.7)    | 338.3 (86.0, 1262.0)   | 0.180   |
| Peak NT-proBNP (ng/mL)              | 1135.0 (442.8, 2544.0) | 1004.0 (405.3, 2307.0) | 1478.0 (525.0, 3217.0) | 0.005   |
| hsCRP (mg/L)                        | 6.7 (2.0, 11.2)        | 5.0 (1.7, 10.8)        | 5.0 (1.7, 11.0)        | 0.058   |
| LDL-C (mmol/L)                      | 1.1 (0.9, 1.2)         | 1.0 (0.9, 1.2)         | 1.0 (0.9, 1.2)         | 0.099   |
| GRACE score                         | 104.0 (85.8, 123.0)    | 107.0 (88.0, 124.0)    | 114.0 (95.0, 136.0)    | < 0.001 |
| Medication at discharge             |                        |                        |                        |         |
| Aspirin                             | 385 (96.0)             | 384 (95.8)             | 373 (93.0)             | 0.135   |
| Ticagrelor                          | 209 (52.4)             | 191 (48.0)             | 165 (42.0)             | 0.013   |
| Clopidogrel                         | 185 (46.4)             | 203 (51.0)             | 219 (55.7)             | 0.031   |
| ACEI/ARB                            | 275 (68.9)             | 286 (71.9)             | 269 (68.4)             | 0.526   |
| Beta Blocker                        | 346 (86.7)             | 338 (84.9)             | 324 (82.4)             | 0.245   |
| Statins                             | 387 (97.0)             | 376 (94.5)             | 376 (95.7)             | 0.214   |
| Adverse outcomes                    |                        |                        |                        |         |
| Death                               | 16 (4.0)               | 23 (5.7)               | 45 (11.2)              | < 0.001 |
| reMI                                | 19 (4.7)               | 17 (4.2)               | 35 (8.7)               | 0.013   |
| reHF                                | 7 (1.7)                | 4 (1.0)                | 11 (2.7)               | 0.180   |
| Revascularization                   | 62 (15.5)              | 61 (15.2)              | 72 (18.0)              | 0.507   |
| Stroke                              | 16 (4.0)               | 13 (3.2)               | 12 (3.0)               | 0.720   |
| MACE                                | 102 (25.4)             | 97 (24.2)              | 144 (35.9)             | < 0.001 |

Continuous variables are presented as medians (25–75th percentiles), and categorical variables are reported as counts (%). ACEIs/ARBs indicates angiotensin-converting enzyme inhibitors/angiotensin receptor blockers; ALT, alanine aminotransferase; AST, aspartate aminotransferase; BMI, body

---

mass index; CKD, chronic kidney disease; cTnI, cardiac troponin I; GRACE, the Global Registry of Acute Coronary Events; HF, heart failure; hsCRP, high-sensitivity C-reactive protein; LDL-C, low-density lipoprotein cholesterol; LVEF, left ventricular ejection fraction; MACE, major adverse cardiovascular event; MI, myocardial infarction; MVD, multiple vessels disease; reHF, rehospitalization caused by heart failure; reMI, recurrent myocardial infarction; STMEI, ST-segment elevation myocardial infarction; NT-proBNP, N-terminal pro B-type natriuretic peptide; STMEI, ST-segment elevation myocardial infarction; PAD, peripheral artery disease; PCI, percutaneous coronary intervention; TMAO, trimethylamine-N-oxide. \*estimated glomerular filtration rate (eGFR) was calculated according to the Modification of Diet in Renal Disease formula.

**Table S2.** Patient characteristics according to median and tertile levels of choline at enrollment.

| Variables                           | Total (n = 1203)       | Low (n = 601)          | High (n = 602)         | P-value |
|-------------------------------------|------------------------|------------------------|------------------------|---------|
| Choline (μmol/L)                    | 1.2 (1.0, 1.5)         | 1.0 (0.8, 1.1)         | 1.5 (1.3, 1.7)         | < 0.001 |
| Demographics                        |                        |                        |                        |         |
| Male                                | 963 (80.0)             | 473 (78.7)             | 490 (81.4)             | 0.273   |
| Age (years)                         | 61.1 (53.0, 69.0)      | 60.0 (51.0, 67.0)      | 63.0 (55.0, 71.0)      | < 0.001 |
| BMI (kg/m <sup>2</sup> )            | 25.8 (23.4, 27.8)      | 25.6 (23.3, 27.7)      | 25.9 (23.4, 28.1)      | 0.024   |
| Killip (II- IV)                     | 153 (12.7)             | 62 (10.3)              | 91 (15.1)              | 0.016   |
| LVEF (%)                            | 55.0 (50.0, 60.0)      | 56.0 (50.0, 60.0)      | 55.0 (50.0, 59.0)      | 0.204   |
| LVEF < 40%                          | 68 (5.7)               | 29 (4.8)               | 39 (6.5)               | 0.264   |
| MVD                                 | 883 (73.4)             | 444 (73.9)             | 439 (72.9)             | 0.757   |
| PCI                                 | 833 (69.2)             | 428 (71.2)             | 405 (67.3)             | 0.156   |
| Medical history                     |                        |                        |                        |         |
| Current Smoker                      | 875 (72.7)             | 432 (71.9)             | 443 (73.6)             | 0.548   |
| Hypertension                        | 786 (65.3)             | 369 (61.4)             | 417 (69.3)             | 0.005   |
| Hyperlipemia                        | 1117 (92.9)            | 551 (91.7)             | 566 (94.0)             | 0.144   |
| Diabetes Mellitus                   | 416 (34.6)             | 183 (30.4)             | 233 (38.7)             | 0.003   |
| Previous Stroke                     | 184 (15.3)             | 75 (12.5)              | 109 (18.1)             | 0.009   |
| CKD                                 | 95 (7.9)               | 32 (5.3)               | 63 (10.5)              | 0.001   |
| PAD                                 | 73 (6.1)               | 33 (5.5)               | 40 (6.6)               | 0.473   |
| Previous MI                         | 220 (18.3)             | 97 (16.1)              | 123 (20.4)             | 0.064   |
| Laboratory indexes                  |                        |                        |                        |         |
| TMAO (μmol/L)                       | 6.6 (4.0, 11.6)        | 5.4 (3.4, 9.3)         | 8.0 (5.0, 14.1)        | < 0.001 |
| Betaine (μmol/L)                    | 1.9 (1.5, 2.4)         | 1.7 (1.4, 2.1)         | 2.1 (1.7, 2.7)         | < 0.001 |
| L-carnitine (μmol/L)                | 50.6 (42.5, 59.6)      | 46.9 (40.0, 55.1)      | 54.6 (45.9, 64.3)      | < 0.001 |
| eGFR (ml/min/1.732m <sup>2*</sup> ) | 76.1 (64.1, 89.4)      | 79.3 (68.5, 91.2)      | 72.5 (59.4, 86.2)      | < 0.001 |
| ALT (IU/L)                          | 32.0 (21.0, 52.0)      | 32.0 (22.0, 50.0)      | 33.0 (19.0, 53.0)      | 0.364   |
| AST (IU/L)                          | 90.0 (44.0, 191.0)     | 93.0 (44.0, 184.8)     | 87.0 (43.8, 197.0)     | 0.961   |
| Baseline cTnI (ng/mL)               | 1.0 (0.1, 5.5)         | 1.1 (0.1, 6.1)         | 0.9 (0.1, 5.0)         | 0.385   |
| Peak cTnI (ng/mL)                   | 9.6 (2.1, 27.2)        | 11.5 (3.1, 28.2)       | 7.7 (1.5, 26.3)        | 0.012   |
| Baseline NT-proBNP (ng/mL)          | 301.8 (83.1, 1007.0)   | 273.7 (76.4, 840.0)    | 339.8 (93.5, 1141.0)   | 0.023   |
| Peak NT-proBNP (ng/mL)              | 1186.0 (469.6, 2776.0) | 1080.0 (468.0, 2505.0) | 1269.0 (469.7, 2956.0) | 0.109   |
| hsCRP (mg/L)                        | 5.5 (1.8, 11.0)        | 5.1 (1.8, 11.0)        | 6.0 (2.0, 11.2)        | 0.326   |
| LDL-C (mmol/L)                      | 2.6 (2.0, 3.2)         | 2.7 (2.0, 3.3)         | 2.5 (1.9, 3.1)         | 0.003   |
| GRACE score                         | 108.0 (89.0, 127.0)    | 105.0 (87.0, 124.0)    | 110.0 (91.0, 130.0)    | < 0.001 |
| Medication at discharge             |                        |                        |                        |         |
| Aspirin                             | 1142 (94.9)            | 575 (95.7)             | 567 (94.2)             | 0.097   |
| Ticagrelor                          | 565 (47.5)             | 302 (50.5)             | 263 (44.4)             | 0.041   |
| Clopidogrel                         | 607 (51.0)             | 291 (48.7)             | 316 (53.4)             | 0.117   |
| ACEI/ARB                            | 830 (69.7)             | 411 (68.7)             | 419 (70.8)             | 0.480   |
| Beta Blocker                        | 1008 (84.7)            | 525 (87.8)             | 483 (81.6)             | 0.004   |
| Statins                             | 1139 (95.7)            | 574 (96.0)             | 565 (95.4)             | 0.747   |
| Adverse outcomes                    |                        |                        |                        |         |
| Death                               | 84 (7.0)               | 30 (5.0)               | 54 (9.0)               | 0.009   |
| reMI                                | 71 (5.9)               | 35 (5.8)               | 36 (6.0)               | 1.000   |
| reHF                                | 22 (1.8)               | 5 (0.8)                | 17 (2.8)               | 0.018   |
| Revascularization                   | 195 (16.2)             | 101 (16.8)             | 94 (15.6)              | 0.630   |
| Stroke                              | 41 (3.4)               | 16 (2.7)               | 25 (4.2)               | 0.206   |
| MACE                                | 343 (28.5)             | 155 (25.8)             | 188 (31.2)             | 0.043   |
| Variables                           | Tertile 1 (n = 401)    | Tertile 2 (n = 401)    | Tertile 3 (n = 401)    | P-value |

|                                     |                        |                        |                        |         |
|-------------------------------------|------------------------|------------------------|------------------------|---------|
| Choline (μmol/L)                    | 0.9 (0.8, 1.0)         | 1.2 (1.1, 1.2)         | 1.6 (1.5, 1.9)         | < 0.001 |
| Demographics                        |                        |                        |                        |         |
| Male                                | 95 (23.7)              | 73 (18.2)              | 72 (18.0)              | 0.071   |
| Age (years)                         | 60.0 (50.0, 67.0)      | 61.0 (54.0, 70.0)      | 63.0 (55.0, 72.0)      | < 0.001 |
| BMI (kg/m <sup>2</sup> )            | 25.4 (23.1, 27.7)      | 25.9 (23.8, 28.0)      | 25.9 (22.9, 28.1)      | 0.041   |
| Killip (II- IV)                     | 39 (9.7)               | 52 (13.0)              | 62 (15.5)              | 0.050   |
| LVEF (%)                            | 56.0 (52.0, 60.0)      | 56.0 (50.0, 60.0)      | 55.0 (48.0, 59.0)      | 0.033   |
| LVEF < 40%                          | 17 (4.2)               | 20 (5.0)               | 31 (7.7)               | 0.079   |
| MVD                                 | 296 (73.8)             | 298 (74.3)             | 289 (72.1)             | 0.752   |
| PCI                                 | 278 (69.3)             | 287 (71.6)             | 268 (66.8)             | 0.347   |
| Medical history                     |                        |                        |                        |         |
| Current Smoker                      | 275 (68.6)             | 300 (74.8)             | 300 (74.8)             | 0.073   |
| Hypertension                        | 237 (59.1)             | 266 (66.3)             | 283 (70.6)             | 0.003   |
| Hyperlipemia                        | 375 (93.5)             | 361 (90.0)             | 381 (95.0)             | 0.019   |
| Diabetes Mellitus                   | 116 (28.9)             | 148 (36.9)             | 152 (37.9)             | 0.014   |
| Previous Stroke                     | 47 (11.7)              | 62 (15.5)              | 75 (18.7)              | 0.023   |
| CKD                                 | 22 (5.5)               | 25 (6.2)               | 48 (12.0)              | < 0.001 |
| PAD                                 | 23 (5.7)               | 18 (4.5)               | 32 (8.0)               | 0.111   |
| Previous MI                         | 59 (14.7)              | 79 (19.7)              | 82 (20.4)              | 0.074   |
| Laboratory indexes                  |                        |                        |                        |         |
| TMAO (μmol/L)                       | 5.1 (3.2, 8.9)         | 6.6 (4.2, 11.3)        | 8.1 (5.0, 14.9)        | < 0.001 |
| Betaine (μmol/L)                    | 1.6 (1.3, 2.0)         | 1.9 (1.5, 2.3)         | 2.2 (1.8, 2.9)         | < 0.001 |
| L-carnitine (μmol/L)                | 45.4 (38.7, 53.4)      | 51.7 (44.4, 59.6)      | 55.7 (46.2, 66.2)      | < 0.001 |
| eGFR (ml/min/1.732m <sup>2</sup> *) | 79.3 (68.3, 91.0)      | 77.5 (66.8, 91.7)      | 70.1 (56.8, 82.8)      | < 0.001 |
| ALT (IU/L)                          | 32.0 (22.0, 49.0)      | 34.0 (22.0, 54.0)      | 31.0 (19.0, 53.0)      | 0.230   |
| AST (IU/L)                          | 101.0 (49.0, 181.0)    | 87.5 (43.0, 204.5)     | 80.0 (41.0, 181.0)     | 0.525   |
| Baseline cTnI (ng/mL)               | 1.1 (0.1, 6.4)         | 1.0 (0.1, 5.0)         | 0.9 (0.1, 5.1)         | 0.805   |
| Peak cTnI (ng/mL)                   | 11.8 (3.4, 28.2)       | 10.0 (2.3, 27.7)       | 7.2 (1.3, 25.1)        | 0.042   |
| Baseline NT-proBNP (ng/mL)          | 270.3 (67.1, 776.6)    | 309.6 (95.2, 900.9)    | 347.6 (92.8, 1331.0)   | 0.020   |
| Peak NT-proBNP (ng/mL)              | 1056.0 (468.0, 2425.0) | 1241.0 (481.0, 2712.0) | 1344.0 (468.8, 3108.0) | 0.165   |
| hsCRP (mg/L)                        | 4.7 (1.7, 10.6)        | 5.7 (1.9, 11.1)        | 6.2 (2.0, 11.3)        | 0.204   |
| LDL-C (mmol/L)                      | 2.7 (2.1, 3.3)         | 2.5 (1.9, 3.2)         | 2.5 (1.9, 3.0)         | 0.003   |
| GRACE score                         | 106.0 (88.0, 123.0)    | 107.0 (89.0, 129.0)    | 110.5 (91.0, 129.0)    | 0.011   |
| Medication at discharge             |                        |                        |                        |         |
| Aspirin                             | 386 (96.3)             | 385 (96.0)             | 371 (92.5)             | 0.119   |
| Ticagrelor                          | 207 (51.9)             | 192 (48.2)             | 166 (42.2)             | 0.023   |
| Clopidogrel                         | 188 (47.1)             | 200 (50.3)             | 219 (55.7)             | 0.050   |
| ACEI/ARB                            | 272 (68.2)             | 280 (70.4)             | 278 (70.7)             | 0.697   |
| Beta Blocker                        | 348 (87.2)             | 338 (84.9)             | 322 (81.9)             | 0.117   |
| Statins                             | 384 (96.2)             | 380 (95.5)             | 375 (95.4)             | 0.816   |
| Adverse outcomes                    |                        |                        |                        |         |
| Death                               | 16 (4.0)               | 24 (6.0)               | 44 (11.0)              | < 0.001 |
| reMI                                | 27 (6.7)               | 20 (5.0)               | 24 (6.0)               | 0.575   |
| reHF                                | 4 (1.0)                | 5 (1.2)                | 13 (3.2)               | 0.034   |
| Revascularization                   | 71 (17.7)              | 73 (18.2)              | 51 (12.7)              | 0.066   |
| Stroke                              | 10 (2.5)               | 13 (3.2)               | 18 (4.5)               | 0.290   |
| MACE                                | 104 (25.9)             | 116 (28.9)             | 123 (30.7)             | 0.323   |

Continuous variables are presented as medians (25–75th percentiles), and categorical variables are reported as counts (%). ACEIs/ARBs indicates angiotensin-converting enzyme inhibitors/angiotensin receptor blockers; ALT, alanine aminotransferase; AST, aspartate aminotransferase; BMI, body mass index; CKD, chronic kidney disease; cTnI, cardiac troponin I; GRACE, the Global Registry of Acute Coronary Events; HF, heart failure; hsCRP, high-sensitivity C-reactive protein; LDL-C, low-density lipoprotein cholesterol; LVEF, left ventricular ejection fraction; MACE, major adverse

---

cardiovascular event; MI, myocardial infarction; MVD, multiple vessels disease; reHF, rehospitalization caused by heart failure; reMI, recurrent myocardial infarction; STMEI, ST-segment elevation myocardial infarction; NT-proBNP, N-terminal pro B-type natriuretic peptide; STMEI, ST-segment elevation myocardial infarction; PAD, peripheral artery disease; PCI, percutaneous coronary intervention; TMAO, trimethylamine-N-oxide. \*estimated glomerular filtration rate (eGFR) was calculated according to the Modification of Diet in Renal Disease formula.

**Table S3.** Patient characteristics according to median and tertile levels of betaine at enrollment.

| Variables                          | Total (n = 1203)       | Low (n = 601)          | High (n = 602)         | P-value |
|------------------------------------|------------------------|------------------------|------------------------|---------|
| Betaine (μmol/L)                   | 1.9 (1.5, 2.4)         | 1.5 (1.2, 1.7)         | 2.4 (2.1, 2.9)         | < 0.001 |
| Demographics                       |                        |                        |                        |         |
| Male                               | 963 (80.0)             | 475 (79.0)             | 488 (81.1)             | 0.419   |
| Age (years)                        | 61.1 (53.0, 69.0)      | 60.0 (51.0, 68.0)      | 63.0 (55.0, 70.8)      | < 0.001 |
| BMI (kg/m <sup>2</sup> )           | 25.8 (23.4, 27.8)      | 25.8 (23.4, 28.0)      | 25.8 (23.3, 27.7)      | 0.238   |
| Killip (II- IV)                    | 153 (12.7)             | 79 (13.1)              | 74 (12.3)              | 0.721   |
| LVEF (%)                           | 55.0 (50.0, 60.0)      | 55.0 (50.0, 60.0)      | 55.0 (50.0, 60.0)      | 0.860   |
| LVEF < 40%                         | 68 (5.7)               | 30 (5.0)               | 38 (6.3)               | 0.386   |
| MVD                                | 883 (73.4)             | 443 (73.7)             | 440 (73.1)             | 0.858   |
| PCI                                | 833 (69.2)             | 447 (74.4)             | 386 (64.1)             | < 0.001 |
| Medical history                    |                        |                        |                        |         |
| Current Smoker                     | 875 (72.7)             | 434 (72.2)             | 441 (73.3)             | 0.733   |
| Hypertension                       | 786 (65.3)             | 387 (64.4)             | 399 (66.3)             | 0.531   |
| Hyperlipemia                       | 1117 (92.9)            | 551 (91.7)             | 566 (94.0)             | 0.144   |
| Diabetes Mellitus                  | 416 (34.6)             | 225 (37.4)             | 191 (31.7)             | 0.043   |
| Previous Stroke                    | 184 (15.3)             | 88 (14.6)              | 96 (15.9)              | 0.583   |
| CKD                                | 95 (7.9)               | 45 (7.5)               | 50 (8.3)               | 0.675   |
| PAD                                | 73 (6.1)               | 25 (4.2)               | 48 (8.0)               | 0.008   |
| Previous MI                        | 220 (18.3)             | 88 (14.6)              | 132 (21.9)             | 0.001   |
| Laboratory indexes                 |                        |                        |                        |         |
| TMAO (μmol/L)                      | 6.6 (4.0, 11.6)        | 6.1 (3.7, 11.3)        | 7.3 (4.4, 12.3)        | 0.002   |
| Choline (μmol/L)                   | 1.2 (1.0, 1.5)         | 1.1 (0.9, 1.3)         | 1.3 (1.1, 1.6)         | < 0.001 |
| L-carnitine (μmol/L)               | 50.6 (42.5, 59.6)      | 49.5 (41.5, 58.6)      | 51.8 (43.5, 61.1)      | 0.003   |
| eGFR (ml/min/1.73m <sup>2*</sup> ) | 50.6 (42.5, 59.6)      | 47.6 (39.8, 54.6)      | 55.2 (45.8, 64.7)      | < 0.001 |
| ALT (IU/L)                         | 32.0 (21.0, 52.0)      | 32.0 (21.0, 52.0)      | 33.0 (21.0, 51.8)      | 0.758   |
| AST (IU/L)                         | 90.0 (44.0, 191.0)     | 93.5 (44.0, 201.2)     | 87.0 (44.0, 181.8)     | 0.424   |
| Baseline cTnI (ng/mL)              | 76.1 (64.1, 89.4)      | 76.1 (64.0, 89.7)      | 76.4 (64.4, 88.4)      | 0.983   |
| Peak cTnI (ng/mL)                  | 1.0 (0.1, 5.5)         | 1.1 (0.1, 6.7)         | 0.9 (0.1, 4.4)         | 0.159   |
| Baseline NT-proBNP (ng/mL)         | 9.6 (2.1, 27.2)        | 13.5 (3.2, 31.1)       | 6.7 (1.5, 22.3)        | < 0.001 |
| Peak NT-proBNP (ng/mL)             | 301.8 (83.1, 1007.0)   | 276.1 (71.0, 919.1)    | 338.9 (98.8, 1063.0)   | 0.069   |
| hsCRP (mg/L)                       | 1186.0 (469.6, 2776.0) | 1210.0 (461.8, 2842.0) | 1129.0 (479.2, 2663.0) | 0.741   |
| LDL-C (mmol/L)                     | 5.5 (1.8, 11.0)        | 6.7 (2.3, 11.2)        | 4.5 (1.6, 10.8)        | < 0.001 |
| GRACE score                        | 2.6 (2.0, 3.2)         | 2.7 (2.1, 3.3)         | 2.4 (1.8, 3.1)         | < 0.001 |
| Medication at discharge            |                        |                        |                        |         |
| Aspirin                            | 1142 (94.9)            | 577 (96.0)             | 565 (93.9)             | 0.209   |
| Ticagrelor                         | 565 (47.5)             | 302 (50.8)             | 263 (44.1)             | 0.024   |
| Clopidogrel                        | 607 (51.0)             | 285 (48.0)             | 322 (54.0)             | 0.043   |
| ACEI/ARB                           | 830 (69.7)             | 413 (69.5)             | 417 (70.0)             | 0.919   |
| Beta Blocker                       | 1008 (84.7)            | 512 (86.2)             | 496 (83.2)             | 0.179   |
| Statins                            | 1139 (95.7)            | 561 (94.4)             | 578 (97.0)             | 0.044   |
| Adverse outcomes                   |                        |                        |                        |         |
| Death                              | 84 (7.0)               | 44 (7.3)               | 40 (6.6)               | 0.728   |
| reMI                               | 71 (5.9)               | 33 (5.5)               | 38 (6.3)               | 0.630   |
| reHF                               | 22 (1.8)               | 8 (1.3)                | 14 (2.3)               | 0.284   |
| Revascularization                  | 195 (16.2)             | 100 (16.6)             | 95 (15.8)              | 0.745   |
| Stroke                             | 41 (3.4)               | 18 (3.0)               | 23 (3.8)               | 0.529   |
| MACE                               | 343 (28.5)             | 175 (29.1)             | 168 (27.9)             | 0.688   |
| Variables                          | Tertile 1 (n = 401)    | Tertile 2 (n = 401)    | Tertile 3 (n = 401)    | P-value |

|                                    |                        |                        |                        |         |
|------------------------------------|------------------------|------------------------|------------------------|---------|
| Betaine (μmol/L)                   | 1.3 (1.1, 1.5)         | 1.9 (1.8, 2.0)         | 2.7 (2.4, 3.1)         | < 0.001 |
| Demographics                       |                        |                        |                        |         |
| Male                               | 314 (78.3)             | 320 (79.8)             | 329 (82.0)             | 0.411   |
| Age (years)                        | 60.0 (49.7, 67.0)      | 60.0 (53.0, 68.0)      | 64.8 (56.0, 72.0)      | < 0.001 |
| BMI (kg/m <sup>2</sup> )           | 26.1 (23.3, 28.4)      | 25.8 (23.7, 27.7)      | 25.5 (22.9, 27.7)      | 0.059   |
| Killip (II- IV)                    | 53 (13.2)              | 52 (13.0)              | 48 (12.0)              | 0.854   |
| LVEF (%)                           | 56.0 (50.0, 60.0)      | 55.0 (48.0, 59.0)      | 56.0 (50.0, 60.0)      | 0.282   |
| LVEF < 40%                         | 17 (4.2)               | 27 (6.7)               | 24 (6.0)               | 0.292   |
| MVD                                | 290 (72.3)             | 308 (76.8)             | 285 (71.1)             | 0.154   |
| PCI                                | 296 (73.8)             | 287 (71.6)             | 250 (62.3)             | < 0.001 |
| Medical history                    |                        |                        |                        |         |
| Current Smoker                     | 296 (73.8)             | 282 (70.3)             | 297 (74.1)             | 0.413   |
| Hypertension                       | 253 (63.1)             | 265 (66.1)             | 268 (66.8)             | 0.500   |
| Hyperlipemia                       | 368 (91.8)             | 378 (94.3)             | 371 (92.5)             | 0.372   |
| Diabetes Mellitus                  | 159 (39.7)             | 130 (32.4)             | 127 (31.7)             | 0.032   |
| Previous Stroke                    | 59 (14.7)              | 60 (15.0)              | 65 (16.2)              | 0.820   |
| CKD                                | 27 (6.7)               | 35 (8.7)               | 33 (8.2)               | 0.552   |
| PAD                                | 15 (3.7)               | 27 (6.7)               | 31 (7.7)               | 0.048   |
| Previous MI                        | 50 (12.5)              | 80 (20.0)              | 90 (22.4)              | < 0.001 |
| Laboratory indexes                 |                        |                        |                        |         |
| TMAO (μmol/L)                      | 5.7 (3.5, 10.5)        | 6.6 (4.3, 12.0)        | 7.5 (4.4, 12.8)        | < 0.001 |
| Choline (μmol/L)                   | 1.0 (0.8, 1.3)         | 1.2 (1.0, 1.4)         | 1.4 (1.1, 1.7)         | < 0.001 |
| L-carnitine (μmol/L)               | 46.3 (37.7, 53.8)      | 51.6 (43.7, 59.6)      | 55.5 (46.0, 64.8)      | < 0.001 |
| eGFR (ml/min/1.73m <sup>2</sup> *) | 75.6 (63.8, 89.0)      | 78.0 (65.7, 89.8)      | 74.3 (63.9, 87.9)      | 0.203   |
| ALT (IU/L)                         | 32.0 (21.0, 52.0)      | 33.0 (22.0, 54.0)      | 33.0 (19.0, 50.0)      | 0.421   |
| AST (IU/L)                         | 95.0 (44.0, 201.5)     | 99.0 (46.0, 193.2)     | 83.0 (43.0, 175.0)     | 0.395   |
| Peak cTnI (ng/mL)                  | 14.6 (4.0, 32.1)       | 8.2 (2.5, 27.2)        | 6.7 (1.1, 21.6)        | < 0.001 |
| Baseline NT-proBNP (ng/mL)         | 300.3 (74.8, 1037.0)   | 300.0 (80.1, 843.0)    | 306.9 (100.3, 1146.0)  | 0.631   |
| Peak NT-proBNP (ng/mL)             | 1338.0 (481.9, 2873.0) | 1031.0 (429.3, 2611.0) | 1133.0 (481.0, 2586.0) | 0.455   |
| hsCRP (mg/L)                       | 7.1 (2.5, 11.5)        | 5.3 (1.8, 11.1)        | 4.5 (1.5, 10.6)        | 0.001   |
| LDL-C (mmol/L)                     | 2.8 (2.2, 3.4)         | 2.6 (2.0, 3.2)         | 2.4 (1.7, 3.0)         | < 0.001 |
| GRACE score                        | 105.0 (84.0, 125.0)    | 106.0 (88.0, 126.2)    | 111.0 (96.0, 129.0)    | 0.002   |
| Medication at discharge            |                        |                        |                        |         |
| Aspirin                            | 388 (96.8)             | 382 (95.3)             | 372 (92.8)             | 0.026   |
| Ticagrelor                         | 209 (52.8)             | 183 (46.1)             | 173 (43.6)             | 0.027   |
| Clopidogrel                        | 185 (46.7)             | 206 (51.9)             | 216 (54.4)             | 0.087   |
| ACEI/ARB                           | 272 (68.7)             | 276 (69.5)             | 282 (71.0)             | 0.767   |
| Beta Blocker                       | 348 (87.9)             | 335 (84.4)             | 325 (81.9)             | 0.061   |
| Statins                            | 374 (94.4)             | 378 (95.2)             | 387 (97.5)             | 0.090   |
| Adverse outcomes                   |                        |                        |                        |         |
| Death                              | 27 (6.7)               | 28 (7.0)               | 29 (7.2)               | 0.962   |
| reMI                               | 19 (4.7)               | 29 (7.2)               | 23 (5.7)               | 0.321   |
| reHF                               | 6 (1.5)                | 3 (0.7)                | 13 (3.2)               | 0.026   |
| Revascularization                  | 67 (16.7)              | 65 (16.2)              | 63 (15.7)              | 0.929   |
| Stroke                             | 12 (3.0)               | 13 (3.2)               | 16 (4.0)               | 0.720   |
| MACE                               | 117 (29.2)             | 111 (27.7)             | 115 (28.7)             | 0.892   |

Continuous variables are presented as medians (25–75th percentiles), and categorical variables are reported as counts (%). ACEIs/ARBs indicates angiotensin-converting enzyme inhibitors/angiotensin receptor blockers; ALT, alanine aminotransferase; AST, aspartate aminotransferase; BMI, body mass index; CKD, chronic kidney disease; cTnI, cardiac troponin I; GRACE, the Global Registry of Acute Coronary Events; HF, heart failure; hsCRP, high-sensitivity C-reactive protein; LDL-C, low-density lipoprotein cholesterol; LVEF, left ventricular ejection fraction; MACE, major adverse cardiovascular event; MI, myocardial infarction; MVD, multiple vessels disease; reHF,



---

rehospitalization caused by heart failure; reMI, recurrent myocardial infarction; STMEI, ST-segment elevation myocardial infarction; NT-proBNP, N-terminal pro B-type natriuretic peptide; STMEI, ST-segment elevation myocardial infarction; PAD, peripheral artery disease; PCI, percutaneous coronary intervention; TMAO, trimethylamine-N-oxide. \*estimated glomerular filtration rate (eGFR) was calculated according to the Modification of Diet in Renal Disease formula.

**Table S4.** Patient characteristics according to median and tertile levels of L-carnitine at enrollment.

| Variables                           | Total (n = 1203)       | Low (n = 601)          | High (n = 602)         | P-value |
|-------------------------------------|------------------------|------------------------|------------------------|---------|
| L-carnitine (μmol/L)                | 50.6 (42.5, 59.6)      | 42.5 (36.5, 46.7)      | 59.6 (55.0, 67.3)      | < 0.001 |
| Demographics                        |                        |                        |                        |         |
| Male                                | 963 (80.0)             | 463 (77.0)             | 500 (83.1)             | 0.011   |
| Age (years)                         | 61.1 (53.0, 69.0)      | 61.0 (53.0, 69.0)      | 61.4 (54.0, 69.0)      | 0.723   |
| BMI (kg/m <sup>2</sup> )            | 25.8 (23.4, 27.8)      | 25.4 (23.1, 27.7)      | 25.9 (23.5, 28.1)      | 0.003   |
| Killip (II- IV)                     | 153 (12.7)             | 77 (12.8)              | 76 (12.6)              | 0.991   |
| LVEF (%)                            | 55.0 (50.0, 60.0)      | 55.0 (50.0, 60.0)      | 55.0 (50.0, 60.0)      | 0.705   |
| LVEF < 40%                          | 68 (5.7)               | 31 (5.2)               | 37 (6.1)               | 0.537   |
| MVD                                 | 883 (73.4)             | 434 (72.2)             | 449 (74.6)             | 0.387   |
| PCI                                 | 833 (69.2)             | 426 (70.9)             | 407 (67.6)             | 0.243   |
| Medical history                     |                        |                        |                        |         |
| Current Smoker                      | 875 (72.7)             | 423 (70.4)             | 452 (75.1)             | 0.077   |
| Hypertension                        | 786 (65.3)             | 388 (64.6)             | 398 (66.1)             | 0.613   |
| Hyperlipemia                        | 1117 (92.9)            | 552 (91.8)             | 565 (93.9)             | 0.215   |
| Diabetes Mellitus                   | 416 (34.6)             | 225 (37.4)             | 191 (31.7)             | 0.043   |
| Previous Stroke                     | 184 (15.3)             | 87 (14.5)              | 97 (16.1)              | 0.479   |
| CKD                                 | 95 (7.9)               | 53 (8.8)               | 42 (7.0)               | 0.281   |
| PAD                                 | 73 (6.1)               | 28 (4.7)               | 45 (7.5)               | 0.054   |
| Previous MI                         | 220 (18.3)             | 90 (15.0)              | 130 (21.6)             | 0.004   |
| Laboratory indexes                  |                        |                        |                        |         |
| TMAO (μmol/L)                       | 6.6 (4.0, 11.6)        | 6.1 (3.8, 10.7)        | 7.3 (4.3, 12.5)        | < 0.001 |
| Choline (μmol/L)                    | 1.2 (1.0, 1.5)         | 1.1 (0.9, 1.3)         | 1.3 (1.1, 1.6)         | < 0.001 |
| Betaine (μmol/L)                    | 1.9 (1.5, 2.4)         | 1.7 (1.3, 2.1)         | 2.0 (1.7, 2.6)         | < 0.001 |
| eGFR (ml/min/1.732m <sup>2</sup> *) | 76.1 (64.1, 89.4)      | 77.5 (64.5, 90.8)      | 75.1 (64.0, 87.5)      | 0.033   |
| ALT (IU/L)                          | 32.0 (21.0, 52.0)      | 31.0 (20.0, 50.0)      | 33.0 (21.0, 54.0)      | 0.141   |
| AST (IU/L)                          | 90.0 (44.0, 191.0)     | 88.0 (40.8, 185.2)     | 93.0 (47.0, 193.8)     | 0.288   |
| Baseline cTnI (ng/mL)               | 1.0 (0.1, 5.5)         | 0.9 (0.1, 6.0)         | 1.0 (0.1, 5.2)         | 0.490   |
| Peak cTnI (ng/mL)                   | 9.6 (2.1, 27.2)        | 11.5 (2.8, 28.9)       | 8.4 (1.5, 25.3)        | 0.003   |
| Baseline NT-proBNP (ng/mL)          | 301.8 (83.1, 1007.0)   | 288.6 (70.9, 955.3)    | 318.6 (96.1, 1047.0)   | 0.127   |
| Peak NT-proBNP (ng/mL)              | 1186.0 (469.6, 2776.0) | 1207.0 (495.5, 2892.0) | 1146.0 (427.2, 2555.0) | 0.243   |
| hsCRP (mg/L)                        | 5.5 (1.8, 11.0)        | 5.5 (1.9, 11.0)        | 5.5 (1.8, 11.2)        | 0.755   |
| LDL-C (mmol/L)                      | 2.6 (2.0, 3.2)         | 2.6 (2.0, 3.3)         | 2.5 (1.9, 3.1)         | < 0.001 |
| GRACE score                         | 108.0 (89.0, 127.0)    | 109.0 (89.0, 128.0)    | 108.0 (89.0, 125.8)    | 0.547   |
| Medication at discharge             |                        |                        |                        |         |
| Aspirin                             | 1142 (94.9)            | 570 (94.8)             | 572 (95.0)             | 0.731   |
| Ticagrelor                          | 565 (47.5)             | 281 (47.3)             | 284 (47.7)             | 0.951   |
| Clopidogrel                         | 607 (51.0)             | 303 (51.0)             | 304 (51.0)             | 1.000   |
| ACEI/ARB                            | 830 (69.7)             | 417 (70.2)             | 413 (69.3)             | 0.782   |
| Beta Blocker                        | 1008 (84.7)            | 509 (85.7)             | 499 (83.7)             | 0.389   |
| Statins                             | 1139 (95.7)            | 565 (95.1)             | 574 (96.3)             | 0.384   |
| Adverse outcomes                    |                        |                        |                        |         |
| Death                               | 84 (7.0)               | 38 (6.3)               | 46 (7.6)               | 0.433   |
| reMI                                | 71 (5.9)               | 31 (5.2)               | 40 (6.6)               | 0.331   |
| reHF                                | 22 (1.8)               | 13 (2.2)               | 9 (1.5)                | 0.516   |
| Revascularization                   | 195 (16.2)             | 93 (15.5)              | 102 (16.9)             | 0.540   |
| Stroke                              | 41 (3.4)               | 20 (3.3)               | 21 (3.5)               | 1.000   |
| MACE                                | 343 (28.5)             | 166 (27.6)             | 177 (29.4)             | 0.535   |
| Variables                           | Tertile 1 (n = 401)    | Tertile 2 (n = 401)    | Tertile 3 (n = 401)    | P-value |
| L-carnitine (μmol/L)                | 38.8 (33.1, 42.5)      | 50.6 (47.9, 53.5)      | 64.6 (59.6, 71.3)      | < 0.001 |

|                                    |                        |                        |                        |         |
|------------------------------------|------------------------|------------------------|------------------------|---------|
|                                    |                        |                        |                        |         |
|                                    |                        |                        |                        |         |
| Demographics                       |                        |                        |                        |         |
| Male                               | 297 (74.1)             | 330 (82.3)             | 336 (83.8)             | 0.001   |
| Age (years)                        | 62.0 (53.0, 69.0)      | 61.0 (53.0, 69.0)      | 62.0 (54.0, 68.0)      | 0.660   |
| BMI (kg/m <sup>2</sup> )           | 25.2 (22.9, 27.6)      | 25.9 (23.4, 28.1)      | 25.9 (23.6, 28.1)      | 0.003   |
| Killip (II- IV)                    | 49 (12.2)              | 51 (12.7)              | 53 (13.2)              | 0.914   |
| LVEF (%)                           | 55.0 (50.0, 60.0)      | 55.0 (50.0, 60.0)      | 56.0 (50.0, 60.0)      | 0.968   |
| LVEF < 40%                         | 18 (4.5)               | 25 (6.2)               | 25 (6.2)               | 0.466   |
| MVD                                | 291 (72.6)             | 300 (74.8)             | 292 (72.8)             | 0.733   |
| PCI                                | 287 (71.6)             | 289 (72.1)             | 257 (64.1)             | 0.023   |
| Medical history                    |                        |                        |                        |         |
| Current Smoker                     | 275 (68.6)             | 294 (73.3)             | 306 (76.3)             | 0.046   |
| Hypertension                       | 258 (64.3)             | 257 (64.1)             | 271 (67.6)             | 0.511   |
| Hyperlipemia                       | 369 (92.0)             | 371 (92.5)             | 377 (94.0)             | 0.521   |
| Diabetes Mellitus                  | 156 (38.9)             | 132 (32.9)             | 128 (31.9)             | 0.080   |
| Previous Stroke                    | 56 (14.0)              | 59 (14.7)              | 69 (17.2)              | 0.410   |
| CKD                                | 36 (9.0)               | 34 (8.5)               | 25 (6.2)               | 0.308   |
| PAD                                | 17 (4.2)               | 22 (5.5)               | 34 (8.5)               | 0.035   |
| Previous MI                        | 58 (14.5)              | 70 (17.5)              | 92 (22.9)              | 0.007   |
| Laboratory indexes                 |                        |                        |                        |         |
| TMAO (μmol/L)                      | 6.1 (3.7, 11.3)        | 6.6 (4.0, 11.1)        | 7.3 (4.5, 12.8)        | 0.011   |
| Choline (μmol/L)                   | 1.0 (0.8, 1.3)         | 1.1 (1.0, 1.4)         | 1.3 (1.1, 1.6)         | < 0.001 |
| Betaine (μmol/L)                   | 1.7 (1.3, 2.1)         | 1.8 (1.5, 2.3)         | 2.1 (1.8, 2.7)         | < 0.001 |
| eGFR (ml/min/1.73m <sup>2</sup> *) | 77.0 (64.4, 91.0)      | 77.0 (65.2, 89.8)      | 74.2 (63.9, 86.8)      | 0.116   |
| ALT (IU/L)                         | 31.0 (20.0, 50.0)      | 32.0 (21.0, 50.0)      | 34.0 (21.0, 55.0)      | 0.381   |
| AST (IU/L)                         | 87.0 (41.0, 182.0)     | 90.0 (45.0, 203.0)     | 93.0 (43.8, 191.2)     | 0.760   |
| Peak cTnI (ng/mL)                  | 11.5 (2.9, 28.5)       | 9.8 (2.2, 27.6)        | 7.1 (1.4, 25.1)        | 0.017   |
| Baseline NT-proBNP (ng/mL)         | 295.0 (61.5, 965.7)    | 302.5 (86.8, 852.0)    | 322.1 (92.9, 1203.0)   | 0.525   |
| Peak NT-proBNP (ng/mL)             | 1274.0 (526.8, 2913.0) | 1064.0 (402.5, 2629.0) | 1196.0 (429.4, 2624.0) | 0.239   |
| hsCRP (mg/L)                       | 5.1 (1.8, 10.7)        | 6.0 (2.0, 10.9)        | 5.4 (1.7, 11.4)        | 0.682   |
| LDL-C (mmol/L)                     | 2.7 (2.1, 3.3)         | 2.6 (2.0, 3.3)         | 2.4 (1.8, 3.0)         | < 0.001 |
| GRACE score                        | 109.0 (90.0, 128.0)    | 107.0 (88.0, 126.0)    | 109.0 (90.0, 126.0)    | 0.445   |
| Medication at discharge            |                        |                        |                        |         |
| Aspirin                            | 383 (95.5)             | 379 (94.5)             | 380 (94.8)             | 0.817   |
| Ticagrelor                         | 191 (48.2)             | 181 (45.7)             | 193 (48.5)             | 0.686   |
| Clopidogrel                        | 199 (50.3)             | 207 (52.3)             | 201 (50.5)             | 0.825   |
| ACEI/ARB                           | 271 (68.4)             | 280 (70.7)             | 279 (70.1)             | 0.771   |
| Beta Blocker                       | 342 (86.4)             | 335 (84.6)             | 331 (83.2)             | 0.456   |
| Statins                            | 377 (95.2)             | 377 (95.2)             | 385 (96.7)             | 0.469   |
| Adverse outcomes                   |                        |                        |                        |         |
| Death                              | 24 (6.0)               | 26 (6.5)               | 34 (8.5)               | 0.341   |
| reMI                               | 21 (5.2)               | 22 (5.5)               | 28 (7.0)               | 0.525   |
| reHF                               | 8 (2.0)                | 7 (1.7)                | 7 (1.7)                | 0.955   |
| Revascularization                  | 61 (15.2)              | 61 (15.2)              | 73 (18.2)              | 0.414   |
| Stroke                             | 11 (2.7)               | 14 (3.5)               | 16 (4.0)               | 0.619   |
| MACE                               | 104 (25.9)             | 112 (27.9)             | 127 (31.7)             | 0.189   |

Continuous variables are presented as medians (25–75th percentiles), and categorical variables are reported as counts (%). ACEIs/ARBs indicates angiotensin-converting enzyme inhibitors/angiotensin receptor blockers; ALT, alanine aminotransferase; AST, aspartate aminotransferase; BMI, body mass index; CKD, chronic kidney disease; cTnI, cardiac troponin I; GRACE, the Global Registry of Acute Coronary Events; HF, heart failure; hsCRP, high-sensitivity C-reactive protein; LDL-C, low-density lipoprotein cholesterol; LVEF, left ventricular ejection fraction; MACE, major adverse cardiovascular event; MI, myocardial infarction; MVD, multiple vessels disease; reHF, rehospitalization caused by heart failure; reMI, recurrent myocardial infarction; STMEI, ST-segment elevation

---

myocardial infarction; NT-proBNP, N-terminal pro B-type natriuretic peptide; STMEI, ST-segment elevation myocardial infarction; PAD, peripheral artery disease; PCI, percutaneous coronary intervention; TMAO, trimethylamine-N-oxide. \*estimated glomerular filtration rate (eGFR) was calculated according to the Modification of Diet in Renal Disease formula.

**Table S5.** Differences in characteristics at baseline between patients with and without TMAO measurements at follow-up visit.

| Variables                           | Total (n = 1203)       | With V2 (n = 509)      | Without V2 (n = 694)   | P-value |
|-------------------------------------|------------------------|------------------------|------------------------|---------|
| Demographics                        |                        |                        |                        |         |
| Male                                | 963 (80.0)             | 423 (83.1)             | 540 (77.8)             | 0.028   |
| Age (years)                         | 61.1 (53.0, 69.0)      | 61.0 (53.4, 68.0)      | 62.0 (53.0, 70.0)      | 0.263   |
| BMI (kg/m <sup>2</sup> )            | 25.8 (23.4, 27.8)      | 25.7 (22.8, 27.8)      | 25.8 (23.5, 28.0)      | 0.197   |
| Killip (II- IV)                     | 153 (12.7)             | 41 (8.1)               | 112 (16.1)             | < 0.001 |
| LVEF (%)                            | 55.0 (50.0, 60.0)      | 56.0 (50.0, 60.0)      | 55.0 (50.0, 60.0)      | 0.147   |
| LVEF < 40%                          | 68 (5.7)               | 24 (4.7)               | 44 (6.3)               | 0.280   |
| MVD                                 | 883 (73.4)             | 365 (71.7)             | 518 (74.6)             | 0.284   |
| PCI                                 | 833 (69.2)             | 359 (70.5)             | 474 (68.3)             | 0.444   |
| Medical history                     |                        |                        |                        |         |
| Current Smoker                      | 875 (72.7)             | 371 (72.9)             | 504 (72.6)             | 0.971   |
| Hypertension                        | 786 (65.3)             | 324 (63.7)             | 462 (66.6)             | 0.323   |
| Hyperlipemia                        | 1117 (92.9)            | 468 (91.9)             | 649 (93.5)             | 0.352   |
| Diabetes Mellitus                   | 416 (34.6)             | 177 (34.8)             | 239 (34.4)             | 0.952   |
| Previous Stroke                     | 184 (15.3)             | 79 (15.5)              | 105 (15.1)             | 0.916   |
| CKD                                 | 95 (7.9)               | 25 (4.9)               | 70 (10.1)              | 0.001   |
| PAD                                 | 73 (6.1)               | 35 (6.9)               | 38 (5.5)               | 0.377   |
| Previous MI                         | 220 (18.3)             | 98 (19.3)              | 122 (17.6)             | 0.505   |
| Laboratory indexes                  |                        |                        |                        |         |
| TMAO (μmol/L)                       | 6.6 (4.0, 11.6)        | 6.7 (4.0, 11.5)        | 6.6 (4.0, 11.8)        | 0.891   |
| Choline (μmol/L)                    | 1.2 (1.0, 1.5)         | 1.2 (1.0, 1.5)         | 1.2 (1.0, 1.5)         | 0.500   |
| Betaine (μmol/L)                    | 1.9 (1.5, 2.4)         | 1.9 (1.5, 2.4)         | 1.9 (1.5, 2.4)         | 0.273   |
| L-carnitine (μmol/L)                | 50.6 (42.5, 59.6)      | 51.2 (43.5, 60.7)      | 50.0 (41.7, 59.0)      | 0.112   |
| eGFR (ml/min/1.732m <sup>2*</sup> ) | 76.1 (64.1, 89.4)      | 75.9 (65.8, 90.4)      | 76.2 (62.7, 88.1)      | 0.078   |
| ALT (IU/L)                          | 32.0 (21.0, 52.0)      | 32.0 (20.0, 52.0)      | 33.0 (21.0, 53.0)      | 0.287   |
| AST (IU/L)                          | 90.0 (44.0, 191.0)     | 87.0 (44.0, 187.0)     | 91.0 (43.0, 193.0)     | 0.703   |
| Baseline cTnI (ng/mL)               | 1.0 (0.1, 5.5)         | 1.1 (0.1, 6.2)         | 0.9 (0.1, 5.1)         | 0.419   |
| Peak cTnI (ng/mL)                   | 9.6 (2.1, 27.2)        | 9.3 (2.0, 24.6)        | 9.9 (2.3, 29.3)        | 0.229   |
| Baseline NT-proBNP (ng/mL)          | 301.8 (83.1, 1007.0)   | 252.5 (70.4, 749.2)    | 337.6 (94.4, 1203.0)   | 0.005   |
| Peak NT-proBNP (ng/mL)              | 1186.0 (469.6, 2776.0) | 1056.0 (429.4, 2186.0) | 1289.0 (476.3, 3154.0) | < 0.001 |
| hsCRP (mg/L)                        | 5.5 (1.8, 11.0)        | 5.4 (1.8, 10.8)        | 5.6 (2.0, 11.2)        | 0.178   |
| LDL-C (mmol/L)                      | 2.6 (2.0, 3.2)         | 2.6 (2.0, 3.2)         | 2.6 (2.0, 3.2)         | 0.801   |
| GRACE score                         | 108.0 (89.0, 127.0)    | 107.0 (90.0, 125.0)    | 109.0 (88.0, 129.0)    | 0.413   |
| Medication at discharge             |                        |                        |                        |         |
| Aspirin                             | 1142 (94.9)            | 484 (95.1)             | 658 (94.8)             | 0.206   |
| Ticagrelor                          | 565 (47.5)             | 251 (49.3)             | 314 (46.1)             | 0.300   |
| Clopidogrel                         | 607 (51.0)             | 255 (50.1)             | 352 (51.7)             | 0.628   |
| ACEI/ARB                            | 830 (69.0)             | 356 (69.9)             | 474 (68.3)             | 0.951   |
| Beta Blocker                        | 1008 (83.8)            | 443 (87.0)             | 565 (81.4)             | 0.065   |
| Statins                             | 1139 (94.7)            | 497 (97.6)             | 642 (92.5)             | 0.007   |
| Adverse outcomes                    |                        |                        |                        |         |
| Death                               | 84 (7.0)               | 24 (4.7)               | 60 (8.6)               | 0.011   |
| reMI                                | 71 (5.9)               | 27 (5.3)               | 44 (6.3)               | 0.529   |
| reHF                                | 22 (1.8)               | 12 (2.4)               | 10 (1.4)               | 0.340   |
| Revascularization                   | 195 (16.2)             | 71 (13.9)              | 124 (17.9)             | 0.081   |
| Stroke                              | 41 (3.4)               | 18 (3.5)               | 23 (3.3)               | 0.961   |
| MACE                                | 343 (28.5)             | 125 (24.6)             | 218 (31.4)             | 0.011   |

Continuous variables are presented as medians (25–75th percentiles), and categorical variables are reported as counts (%). ACEIs/ARBs indicates angiotensin-converting enzyme inhibitors/angiotensin receptor blockers; ALT, alanine aminotransferase; AST, aspartate aminotransferase; BMI, body mass index; CKD, chronic kidney disease; cTnI, cardiac troponin I; GRACE, the Global Registry of Acute Coronary Events; HF, heart failure; hsCRP, high-sensitivity C-reactive protein; LDL-C, low-density lipoprotein cholesterol; LVEF, left ventricular ejection fraction; MACE, major adverse cardiovascular event; MI, myocardial infarction; MVD, multiple vessels disease; reHF, rehospitalization caused by heart failure; reMI, recurrent myocardial infarction; STMEI, ST-segment elevation myocardial infarction; NT-proBNP, N-terminal pro B-type natriuretic peptide; STMEI, ST-segment elevation myocardial infarction; PAD, peripheral artery disease; PCI, percutaneous coronary intervention; TMAO, trimethylamine-N-oxide. \*estimated glomerular filtration rate (eGFR) was calculated according to the Modification of Diet in Renal Disease formula.

**Table S6.** Association between choline levels at enrollment and all endpoints.

| Endpoint        | Group       | Event (n.%) | Crude HR (95%CI)  | P-value | Adjusted HR (95%CI) * | P-value |
|-----------------|-------------|-------------|-------------------|---------|-----------------------|---------|
| MACE            | ≤ median    | 155 (25.8)  | [1]               |         | [1]                   |         |
|                 | > median    | 188 (31.2)  | 1.25 (1.01~1.55)  | 0.037   | 1.08 (0.86~1.35)      | 0.509   |
|                 | Tertile 1   | 104 (25.9)  | [1]               |         | [1]                   |         |
|                 | Tertile 2   | 116 (28.9)  | 1.13 (0.87~1.48)  | 0.350   | 1.12 (0.85~1.46)      | 0.425   |
|                 | Tertile 3   | 123 (30.7)  | 1.20 (0.93~1.56)  | 0.167   | 1.02 (0.77~1.35)      | 0.878   |
|                 | Trend. test | 343 (28.5)  | 1.10 (0.96~1.25)  | 0.168   | 1.01 (0.88~1.16)      | 0.890   |
|                 |             |             |                   |         |                       |         |
| All-cause Death | ≤ median    | 30 (5.0)    | [1]               |         | [1]                   |         |
|                 | > median    | 54 (9.0)    | 1.86 (1.19~2.9)   | 0.007   | 1.08 (0.66~1.77)      | 0.764   |
|                 | Tertile 1   | 16 (4.0)    | [1]               |         | [1]                   |         |
|                 | Tertile 2   | 24 (6.0)    | 1.51 (0.80~2.84)  | 0.202   | 1.28 (0.67~2.45)      | 0.457   |
|                 | Tertile 3   | 44 (11.0)   | 2.89 (1.63~5.13)  | < 0.001 | 1.57 (0.84~2.94)      | 0.157   |
|                 | Trend. test | 84 (7.0)    | 1.74 (1.31~2.30)  | < 0.001 | 1.25 (0.92~1.70)      | 0.153   |
|                 |             |             |                   |         |                       |         |
| reMI            | ≤ median    | 35 (5.8)    | [1]               |         | [1]                   |         |
|                 | > median    | 36 (6.0)    | 1.05 (0.66~1.68)  | 0.827   | 0.94 (0.58~1.53)      | 0.803   |
|                 | Tertile 1   | 27 (6.7)    | [1]               |         | [1]                   |         |
|                 | Tertile 2   | 20 (5.0)    | 0.74 (0.41~1.31)  | 0.298   | 0.73 (0.41~1.33)      | 0.306   |
|                 | Tertile 3   | 24 (6.0)    | 0.92 (0.53~1.59)  | 0.763   | 0.77 (0.43~1.38)      | 0.375   |
|                 | Trend. test | 71 (5.9)    | 0.95 (0.72~1.27)  | 0.746   | 0.87 (0.65~1.18)      | 0.375   |
|                 |             |             |                   |         |                       |         |
| reHF            | ≤ median    | 5 (0.8)     | [1]               |         | [1]                   |         |
|                 | > median    | 17 (2.8)    | 3.56 (1.31~9.64)  | 0.013   | 2.90 (1.02~8.25)      | 0.045   |
|                 | Tertile 1   | 4 (1.0)     | [1]               |         | [1]                   |         |
|                 | Tertile 2   | 5 (1.2)     | 1.27 (0.34~4.72)  | 0.724   | 0.87 (0.21~3.57)      | 0.850   |
|                 | Tertile 3   | 13 (3.2)    | 3.48 (1.13~10.67) | 0.029   | 2.53 (0.78~8.28)      | 0.123   |
|                 | Trend. test | 22 (1.8)    | 2.00 (1.13~3.54)  | 0.017   | 1.76 (0.94~3.27)      | 0.076   |
|                 |             |             |                   |         |                       |         |
| Stroke          | ≤ median    | 16 (2.7)    | [1]               |         | [1]                   |         |
|                 | > median    | 25 (4.2)    | 1.63 (0.87~3.06)  | 0.125   | 1.19 (0.61~2.31)      | 0.605   |
|                 | Tertile 1   | 10 (2.5)    | [1]               |         | [1]                   |         |
|                 | Tertile 2   | 13 (3.2)    | 1.32 (0.58~3.00)  | 0.515   | 1.03 (0.44~2.40)      | 0.950   |
|                 |             |             |                   |         |                       |         |

|                   |             |            |                  |       |                  |       |
|-------------------|-------------|------------|------------------|-------|------------------|-------|
| Revascularization | Tertile 3   | 18 (4.5)   | 1.94 (0.89~4.20) | 0.094 | 1.40 (0.62~3.14) | 0.416 |
|                   | Trend. test | 41 (3.4)   | 1.40 (0.95~2.06) | 0.087 | 1.20 (0.80~1.80) | 0.387 |
|                   | ≤ median    | 101 (16.8) | [1]              |       | [1]              |       |
|                   | > median    | 94 (15.6)  | 0.94 (0.71~1.24) | 0.647 | 0.96 (0.72~1.29) | 0.798 |
|                   | Tertile 1   | 71 (17.7)  | [1]              |       | [1]              |       |
|                   | Tertile 2   | 73 (18.2)  | 1.04 (0.75~1.44) | 0.830 | 1.08 (0.78~1.51) | 0.641 |
|                   | Tertile 3   | 51 (12.7)  | 0.72 (0.50~1.03) | 0.069 | 0.77 (0.53~1.11) | 0.164 |
|                   | Trend. test | 195 (16.2) | 0.86 (0.72~1.02) | 0.077 | 0.89 (0.74~1.06) | 0.187 |

HR, hazard ratio; MACE, major adverse cardiovascular event; reHF, rehospitalization caused by heart failure; reMI, recurrent myocardial infarction. \* Adjusted for the variables with  $P < 0.1$  in the univariable models, including age, hypertension, diabetes, peripheral artery disease, chronic kidney disease, and previous history of stroke and MI, Killip II-IV, the Global Registry of Acute Coronary Events risk score, multiple vessels disease, percutaneous coronary intervention, and the peak value of cardiac troponin I and N-terminal pro B-type natriuretic peptide during hospitalization, as well as estimated glomerular filtration rate and left ventricular ejection fraction.

**Table S7.** Association between betaine levels at enrollment and all endpoints.

| Endpoint        | Group       | Event (n.%) | Crude HR (95%CI) | P-value | Adjusted HR (95%CI) * | P-value |
|-----------------|-------------|-------------|------------------|---------|-----------------------|---------|
| MACE            | ≤ median    | 175 (29.1)  | [1]              |         | [1]                   |         |
|                 | > median    | 168 (27.9)  | 0.95 (0.77~1.17) | 0.618   | 0.88 (0.71~1.11)      | 0.282   |
|                 | Tertile 1   | 117 (29.2)  | [1]              |         | [1]                   |         |
|                 | Tertile 2   | 111 (27.7)  | 0.93 (0.72~1.21) | 0.603   | 0.87 (0.66~1.14)      | 0.307   |
|                 | Tertile 3   | 115 (28.7)  | 0.97 (0.75~1.26) | 0.819   | 0.92 (0.70~1.21)      | 0.552   |
|                 | Trend. test | 343 (28.5)  | 0.98 (0.86~1.12) | 0.819   | 0.96 (0.83~1.10)      | 0.553   |
|                 | ≤ median    | 44 (7.3)    | [1]              |         | [1]                   |         |
|                 | > median    | 40 (6.6)    | 0.91 (0.59~1.39) | 0.658   | 0.84 (0.52~1.35)      | 0.466   |
| All-cause Death | Tertile 1   | 27 (6.7)    | [1]              |         | [1]                   |         |
|                 | Tertile 2   | 28 (7.0)    | 1.03 (0.61~1.75) | 0.903   | 0.67 (0.37~1.21)      | 0.186   |
|                 | Tertile 3   | 29 (7.2)    | 1.07 (0.63~1.81) | 0.796   | 0.88 (0.50~1.56)      | 0.672   |
|                 | Trend. test | 84 (7.0)    | 1.04 (0.80~1.35) | 0.796   | 0.94 (0.70~1.27)      | 0.686   |
|                 | ≤ median    | 33 (5.5)    | [1]              |         | [1]                   |         |
|                 | > median    | 38 (6.3)    | 1.16 (0.73~1.85) | 0.539   | 0.90 (0.55~1.47)      | 0.683   |
|                 | Tertile 1   | 19 (4.7)    | [1]              |         | [1]                   |         |
|                 | Tertile 2   | 29 (7.2)    | 1.54 (0.86~2.74) | 0.146   | 1.29 (0.72~2.33)      | 0.395   |
| reMI            | Tertile 3   | 23 (5.7)    | 1.22 (0.66~2.24) | 0.524   | 0.91 (0.49~1.72)      | 0.779   |
|                 | Trend. test | 71 (5.9)    | 1.09 (0.82~1.45) | 0.547   | 0.95 (0.70~1.28)      | 0.724   |
|                 | ≤ median    | 8 (1.3)     | [1]              |         | [1]                   |         |
|                 | > median    | 14 (2.3)    | 1.74 (0.73~4.15) | 0.212   | 1.78 (0.69~4.58)      | 0.230   |
|                 | Tertile 1   | 6 (1.5)     | [1]              |         | [1]                   |         |
|                 | Tertile 2   | 3 (0.7)     | 0.49 (0.12~1.97) | 0.316   | 0.42 (0.10~1.84)      | 0.251   |
|                 | Tertile 3   | 13 (3.2)    | 2.16 (0.82~5.69) | 0.118   | 2.28 (0.76~6.85)      | 0.142   |
|                 | Trend. test | 22 (1.8)    | 1.65 (0.95~2.84) | 0.073   | 1.79 (0.96~3.35)      | 0.066   |
| reHF            | ≤ median    | 8 (1.3)     | [1]              |         | [1]                   |         |
|                 | > median    | 14 (2.3)    | 1.74 (0.73~4.15) | 0.212   | 1.78 (0.69~4.58)      | 0.230   |
|                 | Tertile 1   | 6 (1.5)     | [1]              |         | [1]                   |         |
|                 | Tertile 2   | 3 (0.7)     | 0.49 (0.12~1.97) | 0.316   | 0.42 (0.10~1.84)      | 0.251   |
|                 | Tertile 3   | 13 (3.2)    | 2.16 (0.82~5.69) | 0.118   | 2.28 (0.76~6.85)      | 0.142   |
|                 | Trend. test | 22 (1.8)    | 1.65 (0.95~2.84) | 0.073   | 1.79 (0.96~3.35)      | 0.066   |
|                 | ≤ median    | 8 (1.3)     | [1]              |         | [1]                   |         |
|                 | > median    | 14 (2.3)    | 1.74 (0.73~4.15) | 0.212   | 1.78 (0.69~4.58)      | 0.230   |

|                   |             |            |                  |       |                  |       |
|-------------------|-------------|------------|------------------|-------|------------------|-------|
| Stroke            | ≤ median    | 18 (3.0)   | [1]              |       | [1]              |       |
|                   | > median    | 23 (3.8)   | 1.29 (0.70~2.39) | 0.419 | 1.21 (0.62~2.32) | 0.578 |
|                   | Tertile 1   | 12 (3.0)   | [1]              |       | [1]              |       |
|                   | Tertile 2   | 13 (3.2)   | 1.09 (0.50~2.38) | 0.833 | 1.14 (0.51~2.55) | 0.742 |
|                   | Tertile 3   | 16 (4.0)   | 1.35 (0.64~2.85) | 0.434 | 1.30 (0.58~2.88) | 0.524 |
|                   | Trend. test | 41 (3.4)   | 1.16 (0.80~1.70) | 0.428 | 1.14 (0.76~1.70) | 0.524 |
| Revascularization | ≤ median    | 100 (16.6) | [1]              |       | [1]              |       |
|                   | > median    | 95 (15.8)  | 0.93 (0.70~1.23) | 0.608 | 0.88 (0.66~1.19) | 0.412 |
|                   | Tertile 1   | 67 (16.7)  | [1]              |       | [1]              |       |
|                   | Tertile 2   | 65 (16.2)  | 0.96 (0.68~1.35) | 0.829 | 0.91 (0.64~1.29) | 0.595 |
|                   | Tertile 3   | 63 (15.7)  | 0.92 (0.65~1.29) | 0.619 | 0.90 (0.62~1.29) | 0.554 |
|                   | Trend. test | 195 (16.2) | 0.96 (0.81~1.14) | 0.619 | 0.95 (0.79~1.14) | 0.553 |

HR, hazard ratio; MACE, major adverse cardiovascular event; reHF, rehospitalization caused by heart failure; reMI, recurrent myocardial infarction. \* Adjusted for the variables with  $P < 0.1$  in the univariable models, including age, hypertension, diabetes, peripheral artery disease, chronic kidney disease, and previous history of stroke and MI, Killip II-IV, the Global Registry of Acute Coronary Events risk score, multiple vessels disease, percutaneous coronary intervention, and the peak value of cardiac troponin I and N-terminal pro B-type natriuretic peptide during hospitalization, as well as estimated glomerular filtration rate and left ventricular ejection fraction.

**Table S8.** Association between L-carnitine levels at visit 1 and all endpoints.

| Endpoint        | Group       | Event (n.%) | Crude HR (95%CI) | P-value | Adjusted HR (95%CI) * | P-value |
|-----------------|-------------|-------------|------------------|---------|-----------------------|---------|
| MACE            | ≤ median    | 166 (27.6)  | [1]              |         | [1]                   |         |
|                 | > median    | 177 (29.4)  | 1.07 (0.87~1.33) | 0.512   | 1.10 (0.89~1.38)      | 0.382   |
|                 | Tertile 1   | 104 (25.9)  | [1]              |         | [1]                   |         |
|                 | Tertile 2   | 112 (27.9)  | 1.09 (0.84~1.42) | 0.524   | 1.12 (0.85~1.48)      | 0.405   |
|                 | Tertile 3   | 127 (31.7)  | 1.25 (0.97~1.62) | 0.088   | 1.26 (0.96~1.65)      | 0.090   |
|                 | Trend. test | 343 (28.5)  | 1.12 (0.98~1.28) | 0.087   | 1.12 (0.98~1.29)      | 0.089   |
| All-cause Death | ≤ median    | 38 (6.3)    | [1]              |         | [1]                   |         |
|                 | > median    | 46 (7.6)    | 1.21 (0.79~1.86) | 0.389   | 1.29 (0.81~2.07)      | 0.279   |
|                 | Tertile 1   | 24 (6.0)    | [1]              |         | [1]                   |         |
|                 | Tertile 2   | 26 (6.5)    | 1.09 (0.62~1.89) | 0.771   | 1.14 (0.62~2.07)      | 0.678   |
|                 | Tertile 3   | 34 (8.5)    | 1.41 (0.84~2.38) | 0.198   | 1.47 (0.83~2.60)      | 0.182   |
|                 | Trend. test | 84 (7.0)    | 1.19 (0.92~1.55) | 0.189   | 1.22 (0.92~1.62)      | 0.177   |
| reMI            | ≤ median    | 31 (5.2)    | [1]              |         | [1]                   |         |
|                 | > median    | 40 (6.6)    | 1.30 (0.81~2.08) | 0.273   | 1.20 (0.75~1.94)      | 0.447   |
|                 | Tertile 1   | 21 (5.2)    | [1]              |         | [1]                   |         |
|                 | Tertile 2   | 22 (5.5)    | 1.06 (0.58~1.93) | 0.845   | 1.05 (0.57~1.92)      | 0.880   |
|                 | Tertile 3   | 28 (7.0)    | 1.35 (0.76~2.37) | 0.303   | 1.19 (0.67~2.12)      | 0.554   |
|                 |             |             |                  |         |                       |         |



|                   |                |            |                  |       |                  |       |
|-------------------|----------------|------------|------------------|-------|------------------|-------|
| reHF              | Trend.<br>test | 71 (5.9)   | 1.17 (0.88~1.55) | 0.295 | 1.09 (0.82~1.46) | 0.547 |
|                   | ≤ median       | 13 (2.2)   | [1]              |       | [1]              |       |
|                   | > median       | 9 (1.5)    | 0.69 (0.29~1.61) | 0.387 | 0.77 (0.32~1.90) | 0.574 |
|                   | Tertile 1      | 8 (2.0)    | [1]              |       | [1]              |       |
|                   | Tertile 2      | 7 (1.7)    | 0.88 (0.32~2.41) | 0.797 | 1.21 (0.41~3.58) | 0.725 |
| Stroke            | Tertile 3      | 7 (1.7)    | 0.87 (0.32~2.41) | 0.792 | 1.08 (0.36~3.23) | 0.884 |
|                   | Trend.<br>test | 22 (1.8)   | 0.93 (0.56~1.56) | 0.790 | 1.04 (0.61~1.77) | 0.886 |
|                   | ≤ median       | 20 (3.3)   | [1]              |       | [1]              |       |
|                   | > median       | 21 (3.5)   | 1.05 (0.57~1.94) | 0.873 | 0.97 (0.52~1.84) | 0.933 |
|                   | Tertile 1      | 11 (2.7)   | [1]              |       | [1]              |       |
| Revascularization | Tertile 2      | 14 (3.5)   | 1.29 (0.58~2.83) | 0.533 | 1.29 (0.58~2.86) | 0.539 |
|                   | Tertile 3      | 16 (4.0)   | 1.46 (0.68~3.14) | 0.336 | 1.30 (0.58~2.89) | 0.520 |
|                   | Trend.<br>test | 41 (3.4)   | 1.20 (0.82~1.75) | 0.339 | 1.13 (0.77~1.68) | 0.528 |
|                   | ≤ median       | 93 (15.5)  | [1]              |       | [1]              |       |
|                   | > median       | 102 (16.9) | 1.11 (0.84~1.47) | 0.455 | 1.12 (0.84~1.50) | 0.437 |
|                   | Tertile 1      | 61 (15.2)  | [1]              |       | [1]              |       |
|                   | Tertile 2      | 61 (15.2)  | 1.01 (0.71~1.44) | 0.970 | 0.99 (0.69~1.43) | 0.977 |
|                   | Tertile 3      | 73 (18.2)  | 1.22 (0.87~1.72) | 0.247 | 1.24 (0.88~1.76) | 0.225 |
|                   | Trend.<br>test | 195 (16.2) | 1.11 (0.93~1.32) | 0.241 | 1.12 (0.94~1.33) | 0.218 |

HR, hazard ratio; MACE, major adverse cardiovascular event; reHF, rehospitalization caused by heart failure; reMI, recurrent myocardial infarction. \* Adjusted for the variables with  $P < 0.1$  in the univariable models, including age, hypertension, diabetes, peripheral artery disease, chronic kidney disease, and previous history of stroke and MI, Killip II-IV, the Global Registry of Acute Coronary Events risk score, multiple vessels disease, percutaneous coronary intervention, and the peak value of cardiac troponin I and N-terminal pro B-type natriuretic peptide during hospitalization, as well as estimated glomerular filtration rate and left ventricular ejection fraction.

**Table S9.** Association between choline levels of V1 and V2 and all endpoints.

| Endpoint        | Group       | Event (n.%) | Crude HR (95%CI)     | P-value | Adjusted HR (95%CI) * | P-value | Adjusted HR (95%CI) # | P-value |
|-----------------|-------------|-------------|----------------------|---------|-----------------------|---------|-----------------------|---------|
| MACE            | L/L         | 27 (18.4)   | [1]                  |         | [1]                   |         | [1]                   |         |
|                 | L/H         | 24 (22.4)   | 1.23 (0.71~2.14)     | 0.454   | 1.31 (0.74~2.34)      | 0.358   | 1.33 (0.74~2.39)      | 0.340   |
|                 | H/L         | 26 (24.3)   | 1.36 (0.79~2.33)     | 0.266   | 1.31 (0.74~2.31)      | 0.357   | 1.31 (0.74~2.31)      | 0.355   |
|                 | H/H         | 42 (28.4)   | 1.71 (1.05~2.77)     | 0.030   | 1.69 (1.01~2.83)      | 0.047   | 1.70 (1.01~2.86)      | 0.045   |
|                 | Trend. test | 119 (23.4)  | 1.19 (1.02~1.39)     | 0.028   | 1.17 (1.00~1.38)      | 0.056   | 1.17 (1.00~1.38)      | 0.056   |
|                 | Group 1     | 51 (20.1)   | [1]                  |         | [1]                   |         | [1]                   |         |
|                 | Group 2     | 26 (24.3)   | 1.24 (0.77~1.98)     | 0.378   | 1.16 (0.70~1.92)      | 0.559   | 1.16 (0.70~1.92)      | 0.565   |
|                 | Group 3     | 42 (28.4)   | 1.55 (1.03~2.34)     | 0.034   | 1.50 (0.96~2.34)      | 0.073   | 1.50 (0.96~2.34)      | 0.072   |
|                 | Trend. test | 119 (23.4)  | 1.25 (1.02~1.53)     | 0.034   | 1.22 (0.98~1.53)      | 0.076   | 1.22 (0.98~1.53)      | 0.076   |
|                 |             |             |                      |         |                       |         |                       |         |
|                 | L/L         | 5 (3.4)     | [1]                  |         | [1]                   |         | [1]                   |         |
|                 | L/H         | 6 (5.6)     | 1.72 (0.52~5.63)     | 0.373   | 1.59 (0.43~5.87)      | 0.490   | 1.81 (0.47~6.93)      | 0.385   |
|                 | H/L         | 5 (4.7)     | 1.34 (0.39~4.63)     | 0.644   | 0.93 (0.23~3.76)      | 0.919   | 0.95 (0.24~3.84)      | 0.944   |
|                 | H/H         | 8 (5.4)     | 1.71 (0.56~5.24)     | 0.345   | 0.87 (0.25~3.06)      | 0.830   | 0.92 (0.26~3.24)      | 0.899   |
| All-cause Death | Trend. test | 24 (4.7)    | 1.15 (0.81~1.61)     | 0.435   | 0.92 (0.62~1.36)      | 0.674   | 0.93 (0.63~1.37)      | 0.714   |
|                 | Group 1     | 11 (4.3)    | [1]                  |         | [1]                   |         | [1]                   |         |
|                 | Group 2     | 5 (4.7)     | 1.04 (0.36~2.98)     | 0.949   | 0.75 (0.22~2.57)      | 0.648   | 0.73 (0.21~2.52)      | 0.623   |
|                 | Group 3     | 8 (5.4)     | 1.32 (0.53~3.29)     | 0.547   | 0.71 (0.24~2.12)      | 0.544   | 0.72 (0.24~2.15)      | 0.558   |
|                 | Trend. test | 24 (4.7)    | 1.15 (0.72~1.81)     | 0.561   | 0.84 (0.49~1.45)      | 0.529   | 0.84 (0.49~1.46)      | 0.542   |
|                 |             |             |                      |         |                       |         |                       |         |
|                 | L/L         | 5 (3.4)     | [1]                  |         | [1]                   |         | [1]                   |         |
|                 | L/H         | 2 (1.9)     | 0.56 (0.11~2.90)     | 0.492   | 0.82 (0.15~4.34)      | 0.812   | 0.83 (0.15~4.50)      | 0.830   |
|                 | H/L         | 8 (7.5)     | 2.22 (0.72~6.78)     | 0.163   | 2.97 (0.93~9.48)      | 0.066   | 2.96 (0.93~9.44)      | 0.067   |
|                 | H/H         | 8 (5.4)     | 1.71 (0.56~5.25)     | 0.344   | 2.13 (0.65~6.96)      | 0.210   | 2.15 (0.66~7.03)      | 0.207   |
|                 | Trend. test | 23 (4.5)    | 1.29 (0.91~1.85)     | 0.155   | 1.37 (0.95~1.98)      | 0.091   | 1.38 (0.95~1.99)      | 0.089   |
|                 | Group 1     | 7 (2.8)     | [1]                  |         | [1]                   |         | [1]                   |         |
|                 | Group 2     | 8 (7.5)     | 2.71 (0.98~7.47)     | 0.055   | 3.17 (1.11~9.01)      | 0.031   | 3.13 (1.09~8.97)      | 0.034   |
|                 | Group 3     | 8 (5.4)     | 2.10 (0.76~5.78)     | 0.153   | 2.27 (0.77~6.66)      | 0.135   | 2.27 (0.78~6.67)      | 0.135   |
|                 | Trend. test | 23 (4.5)    | 1.43 (0.90~2.28)     | 0.129   | 1.52 (0.93~2.48)      | 0.098   | 1.52 (0.93~2.49)      | 0.098   |
| reMI            | L/L         | 0 (0)       | [1]                  |         | [1]                   |         | [1]                   |         |
|                 | L/H         | 2 (1.9)     | 74171112.77 (0~Inf)  | 0.997   | 152352873.18 (0~Inf)  | 0.998   | 121374977.96 (0~Inf)  | 0.997   |
|                 | H/L         | 4 (3.7)     | 148948820.01 (0~Inf) | 0.997   | 180257312.95 (0~Inf)  | 0.998   | 88712522.97 (0~Inf)   | 0.997   |
|                 | H/H         | 5 (3.4)     | 137068286.14 (0~Inf) | 0.997   | 131293570.64 (0~Inf)  | 0.998   | 78872116.51 (0~Inf)   | 0.997   |
|                 | Trend. test |             |                      |         |                       |         |                       |         |
| reHF            | L/L         | 0 (0)       | [1]                  |         | [1]                   |         | [1]                   |         |
|                 | L/H         | 2 (1.9)     | 74171112.77 (0~Inf)  | 0.997   | 152352873.18 (0~Inf)  | 0.998   | 121374977.96 (0~Inf)  | 0.997   |
|                 | H/L         | 4 (3.7)     | 148948820.01 (0~Inf) | 0.997   | 180257312.95 (0~Inf)  | 0.998   | 88712522.97 (0~Inf)   | 0.997   |
|                 | H/H         | 5 (3.4)     | 137068286.14 (0~Inf) | 0.997   | 131293570.64 (0~Inf)  | 0.998   | 78872116.51 (0~Inf)   | 0.997   |
|                 | Trend. test |             |                      |         |                       |         |                       |         |

|                   |             |           |                   |       |                   |       |                   |       |
|-------------------|-------------|-----------|-------------------|-------|-------------------|-------|-------------------|-------|
| Stroke            | Trend. test | 11 (2.2)  | 1.87 (1.03~3.42)  | 0.041 | 1.69 (0.60~4.77)  | 0.322 | 1.75 (0.61~5.05)  | 0.299 |
|                   | Group 1     | 2 (0.8)   | [1]               |       | [1]               |       | [1]               |       |
|                   | Group 2     | 4 (3.7)   | 4.78 (0.88~26.10) | 0.071 | 3.21 (0.26~38.99) | 0.360 | 2.81 (0.23~34.21) | 0.417 |
|                   | Group 3     | 5 (3.4)   | 4.40 (0.85~22.68) | 0.077 | 2.70 (0.20~36.02) | 0.453 | 2.68 (0.20~35.54) | 0.454 |
|                   | Trend. test | 11 (2.2)  | 1.90 (0.95~3.81)  | 0.072 | 1.59 (0.47~5.35)  | 0.457 | 1.61 (0.47~5.53)  | 0.451 |
|                   | L/L         | 2 (1.4)   | [1]               |       | [1]               |       | [1]               |       |
|                   | L/H         | 5 (4.7)   | 3.46 (0.67~17.86) | 0.137 | 3.18 (0.58~17.61) | 0.185 | 3.41 (0.61~19.18) | 0.163 |
|                   | H/L         | 1 (0.9)   | 0.68 (0.06~7.54)  | 0.756 | 0.43 (0.03~5.68)  | 0.522 | 0.46 (0.04~6.07)  | 0.557 |
|                   | H/H         | 10 (6.8)  | 5.26 (1.15~24.00) | 0.032 | 4.69 (0.94~23.39) | 0.059 | 5.26 (1.03~26.96) | 0.046 |
|                   | Trend. test | 18 (3.5)  | 1.55 (1.01~2.37)  | 0.045 | 1.46 (0.91~2.35)  | 0.113 | 1.50 (0.93~2.41)  | 0.095 |
|                   | Group 1     | 7 (2.8)   | [1]               |       | [1]               |       | [1]               |       |
|                   | Group 2     | 1 (0.9)   | 0.34 (0.04~2.73)  | 0.308 | 0.21 (0.02~2.08)  | 0.182 | 0.22 (0.02~2.14)  | 0.191 |
|                   | Group 3     | 10 (6.8)  | 2.59 (0.99~6.80)  | 0.054 | 2.38 (0.82~6.92)  | 0.111 | 2.54 (0.86~7.51)  | 0.091 |
|                   | Trend. test | 18 (3.5)  | 1.67 (0.98~2.85)  | 0.059 | 1.55 (0.86~2.81)  | 0.144 | 1.60 (0.88~2.91)  | 0.124 |
|                   | L/L         | 21 (14.3) | [1]               |       | [1]               |       | [1]               |       |
| Revascularization | L/H         | 13 (12.1) | 0.85 (0.42~1.69)  | 0.637 | 0.94 (0.46~1.94)  | 0.866 | 0.92 (0.44~1.92)  | 0.818 |
|                   | H/L         | 15 (14.0) | 0.98 (0.05~1.90)  | 0.951 | 1.13 (0.58~2.23)  | 0.716 | 1.13 (0.58~2.24)  | 0.715 |
|                   | H/H         | 20 (13.5) | 0.97 (0.53~1.79)  | 0.926 | 1.22 (0.63~2.35)  | 0.562 | 1.20 (0.62~2.33)  | 0.595 |
|                   | Trend. test | 69 (13.6) | 1.00 (0.82~1.22)  | 0.991 | 1.08 (0.87~1.33)  | 0.497 | 1.07 (0.87~1.33)  | 0.510 |
|                   | Group 1     | 34 (13.4) | [1]               |       | [1]               |       | [1]               |       |
|                   | Group 2     | 15 (14.0) | 1.05 (0.57~1.92)  | 0.882 | 1.16 (0.62~2.16)  | 0.637 | 1.17 (0.63~2.19)  | 0.619 |
|                   | Group 3     | 20 (13.5) | 1.04 (0.60~1.81)  | 0.892 | 1.25 (0.68~2.27)  | 0.473 | 1.24 (0.68~2.26)  | 0.483 |
|                   | Trend. test | 69 (13.6) | 1.02 (0.78~1.34)  | 0.882 | 1.12 (0.83~1.50)  | 0.449 | 1.12 (0.83~1.50)  | 0.454 |

Patients were divided into four groups according to choline levels at the enrollment (V1) and follow-up visit (V2) relative to the median of each visit point (1.2  $\mu\text{mol/L}$  and 1.7  $\mu\text{mol/L}$  for V1 and V2, respectively). L/L, low V1 and low V2; L/H, low V1 and high V2; H/L, high V1 and low V2; H/H, high V1 and high V2. Group1: patients with choline levels below the median at V1; Group 2: patients with higher levels of choline at V1 and subsequently lower levels at V2; Group3: patients with both higher choline levels at V1 and V2. HR, hazard ratio; MACE, major adverse cardiovascular event; reHF, rehospitalization caused by heart failure; reMI, recurrent myocardial infarction; TMAO, trimethylamine-N-oxide. \* Model 1: Adjusted for the variables with  $P < 0.1$  in the univariable models, including age, hypertension, diabetes, peripheral artery disease, chronic kidney disease, and previous history of stroke and MI, Killip II-IV, the Global Registry of Acute Coronary Events risk score, multiple vessels disease, percutaneous coronary intervention, and the peak value of cardiac troponin I and N-terminal pro B-type natriuretic peptide during hospitalization, as well as estimated glomerular filtration rate and left ventricular ejection fraction at V2. \* Model 2: Model 1+ TMAO levels at V2.

**Table S10.** Association between betaine levels of V1 and V2 and all endpoints.

| Endpoint | Group | Event (n.%) | Crude HR (95%CI) | P-value | Adjusted HR (95%CI) * | P-value |
|----------|-------|-------------|------------------|---------|-----------------------|---------|
| MACE     | L/L   | 37 (25.9)   | [1]              |         | [1]                   |         |

|                   |             |            |                  |       |                   |       |
|-------------------|-------------|------------|------------------|-------|-------------------|-------|
| All-cause Death   | L/H         | 24 (21.6)  | 0.84 (0.50~1.41) | 0.514 | 0.88 (0.51~1.51)  | 0.634 |
|                   | H/L         | 25 (22.5)  | 0.87 (0.52~1.44) | 0.584 | 0.81 (0.47~1.41)  | 0.453 |
|                   | H/H         | 33 (22.9)  | 0.91 (0.57~1.46) | 0.695 | 0.87 (0.53~1.43)  | 0.583 |
|                   | Trend. test | 119 (23.4) | 0.97 (0.83~1.13) | 0.718 | 0.95 (0.81~1.12)  | 0.551 |
|                   |             |            |                  |       |                   |       |
| reMI              | L/L         | 9 (6.3)    | [1]              |       | [1]               |       |
|                   | L/H         | 5 (4.5)    | 0.76 (0.25~2.27) | 0.620 | 0.76 (0.19~2.98)  | 0.692 |
|                   | H/L         | 6 (5.4)    | 0.88 (0.31~2.47) | 0.807 | 0.66 (0.19~2.28)  | 0.513 |
|                   | H/H         | 4 (2.8)    | 0.46 (0.14~1.50) | 0.199 | 0.38 (0.10~1.40)  | 0.145 |
|                   | Trend. test | 24 (4.7)   | 0.82 (0.58~1.15) | 0.249 | 0.74 (0.50~1.11)  | 0.144 |
| reHF              | L/L         | 7 (4.9)    | [1]              |       | [1]               |       |
|                   | L/H         | 3 (2.7)    | 0.58 (0.15~2.25) | 0.432 | 0.62 (0.15~2.50)  | 0.497 |
|                   | H/L         | 6 (5.4)    | 1.13 (0.38~3.37) | 0.825 | 1.10 (0.35~3.43)  | 0.866 |
|                   | H/H         | 7 (4.9)    | 1.04 (0.37~2.98) | 0.935 | 0.95 (0.32~2.83)  | 0.932 |
|                   | Trend. test | 23 (4.5)   | 1.06 (0.75~1.50) | 0.741 | 1.03 (0.72~1.46)  | 0.891 |
| Stroke            | L/L         | 3 (2.1)    | [1]              |       | [1]               |       |
|                   | L/H         | 1 (0.9)    | 0.43 (0.04~4.12) | 0.463 | 0.38 (0.02~8.90)  | 0.547 |
|                   | H/L         | 3 (2.7)    | 1.29 (0.26~6.37) | 0.758 | 2.67 (0.21~34.21) | 0.450 |
|                   | H/H         | 4 (2.8)    | 1.33 (0.30~5.93) | 0.710 | 1.13 (0.12~10.38) | 0.915 |
|                   | Trend. test | 11 (2.2)   | 1.18 (0.71~1.97) | 0.525 | 1.13 (0.57~2.27)  | 0.722 |
| Revascularization | L/L         | 4 (2.8)    | [1]              |       | [1]               |       |
|                   | L/H         | 3 (2.7)    | 0.97 (0.22~4.31) | 0.963 | 1.10 (0.23~5.35)  | 0.903 |
|                   | H/L         | 6 (5.4)    | 1.93 (0.55~6.85) | 0.307 | 1.85 (0.46~7.49)  | 0.388 |
|                   | H/H         | 5 (3.5)    | 1.25 (0.34~4.66) | 0.738 | 1.12 (0.27~4.55)  | 0.875 |
|                   | Trend. test | 18 (3.5)   | 1.13 (0.76~1.68) | 0.546 | 1.07 (0.69~1.63)  | 0.771 |
|                   | L/L         | 19 (13.3)  | [1]              |       | [1]               |       |
|                   | L/H         | 17 (15.3)  | 1.19 (0.62~2.29) | 0.604 | 1.21 (0.61~2.38)  | 0.583 |
|                   | H/L         | 15 (13.5)  | 1.02 (0.52~2.00) | 0.959 | 0.87 (0.43~1.79)  | 0.714 |
|                   | H/H         | 18 (12.5)  | 0.95 (0.50~1.81) | 0.871 | 0.84 (0.43~1.64)  | 0.606 |
|                   | Trend. test | 69 (13.6)  | 0.97 (0.80~1.19) | 0.781 | 0.93 (0.75~1.14)  | 0.479 |

Patients were divided into four groups according to betaine levels at the enrollment (V1) and follow-up visit (V2) relative to the median of each visit point (1.9  $\mu$ mol/L and 3.1 $\mu$ mol/L for V1 and V2, respectively). L/L, low V1 and low V2; L/H, low V1 and high V2; H/L, high V1 and low V2; H/H, high V1 and high V2. HR, hazard ratio; MACE, major adverse cardiovascular event; reHF, rehospitalization caused by heart failure; reMI, recurrent myocardial infarction. \* Adjusted for the variables with  $P < 0.1$  in the univariable models, including age, hypertension, diabetes, peripheral artery disease, chronic kidney disease, and previous history of stroke and MI, Killip II-IV, the Global Registry of Acute Coronary Events risk score, multiple vessels disease, percutaneous coronary intervention, and the peak value of cardiac troponin I and N-terminal pro B-type natriuretic peptide during hospitalization, as well as estimated glomerular filtration rate and left ventricular ejection fraction at V2.

**Table S11.** Association between L-carnitine levels of V1 and V2 and all endpoints.

| Endpoint | Group | Event (n.%) | Crude HR (95%CI) | P-value | Adjusted HR (95%CI) * | P-value |
|----------|-------|-------------|------------------|---------|-----------------------|---------|
| MACE     | L/L   | 37 (24.0)   | [1]              |         | [1]                   |         |
|          | L/H   | 25 (25.0)   | 1.07 (0.65~1.78) | 0.788   | 1.02 (0.59~1.76)      | 0.952   |
|          | H/L   | 19 (19.0)   | 0.77 (0.44~1.34) | 0.358   | 0.70 (0.39~1.26)      | 0.234   |
|          | H/H   | 38 (24.5)   | 1.06 (0.67~1.67) | 0.804   | 1.06 (0.66~1.72)      | 0.801   |
|          |       |             |                  |         |                       |         |

|                   |             |            |                  |       |                     |       |
|-------------------|-------------|------------|------------------|-------|---------------------|-------|
| All-cause Death   | Trend. test | 119 (23.4) | 1.00 (0.86~1.16) | 0.970 | 1.00 (0.85~1.17)    | 0.984 |
|                   | L/L         | 5 (3.2)    | [1]              |       | [1]                 |       |
|                   | L/H         | 7 (7.0)    | 2.30 (0.73~7.24) | 0.156 | 1.77 (0.44~7.07)    | 0.418 |
|                   | H/L         | 6 (6.0)    | 1.83 (0.56~5.98) | 0.320 | 1.28 (0.30~5.34)    | 0.739 |
|                   | H/H         | 6 (3.9)    | 1.24 (0.38~4.06) | 0.724 | 1.31 (0.35~4.87)    | 0.692 |
| reMI              | Trend. test | 24 (4.7)   | 1.03 (0.74~1.44) | 0.844 | 1.03 (0.70~1.53)    | 0.866 |
|                   | L/L         | 8 (5.2)    | [1]              |       | [1]                 |       |
|                   | L/H         | 1 (1.0)    | 0.20 (0.03~1.60) | 0.130 | 0.19 (0.02~1.56)    | 0.122 |
|                   | H/L         | 6 (6.0)    | 1.16 (0.40~3.33) | 0.787 | 1.13 (0.36~3.56)    | 0.832 |
|                   | H/H         | 8 (5.2)    | 1.04 (0.39~2.77) | 0.941 | 0.99 (0.34~2.90)    | 0.992 |
| reHF              | Trend. test | 23 (4.5)   | 1.09 (0.77~1.53) | 0.630 | 1.08 (0.74~1.55)    | 0.698 |
|                   | L/L         | 3 (1.9)    | [1]              |       | [1]                 |       |
|                   | L/H         | 4 (4.0)    | 2.12 (0.47~9.48) | 0.325 | 36.05 (1.04~1253.5) | 0.048 |
|                   | H/L         | 2 (2.0)    | 1.03 (0.17~6.18) | 0.972 | 4.12 (0.16~106.26)  | 0.393 |
|                   | H/H         | 2 (1.3)    | 0.66 (0.11~3.96) | 0.652 | 5.23 (0.18~149.17)  | 0.333 |
| Stroke            | Trend. test | 11 (2.2)   | 0.85 (0.52~1.40) | 0.526 | 1.12 (0.56~2.27)    | 0.747 |
|                   | L/L         | 6 (3.9)    | [1]              |       | [1]                 |       |
|                   | L/H         | 2 (2.0)    | 0.52 (0.11~2.60) | 0.430 | 0.55 (0.08~3.52)    | 0.524 |
|                   | H/L         | 1 (1.0)    | 0.25 (0.03~2.12) | 0.206 | 0.30 (0.03~2.78)    | 0.291 |
|                   | H/H         | 9 (5.8)    | 1.54 (0.55~4.32) | 0.415 | 1.72 (0.53~5.61)    | 0.370 |
| Revascularization | Trend. test | 18 (3.5)   | 1.17 (0.80~1.73) | 0.421 | 1.24 (0.82~1.88)    | 0.316 |
|                   | L/L         | 24 (15.6)  | [1]              |       | [1]                 |       |
|                   | L/H         | 12 (12.0)  | 0.78 (0.39~1.56) | 0.486 | 0.62 (0.29~1.31)    | 0.210 |
|                   | H/L         | 11 (11.0)  | 0.70 (0.34~1.42) | 0.322 | 0.66 (0.32~1.38)    | 0.273 |
|                   | H/H         | 22 (14.2)  | 0.93 (0.52~1.66) | 0.815 | 0.86 (0.47~1.58)    | 0.632 |
|                   | Trend. test | 69 (13.6)  | 0.97 (0.80~1.18) | 0.756 | 0.96 (0.78~1.18)    | 0.670 |

Patients were divided into four groups according to L-carnitine levels at the enrollment (V1) and follow-up visit (V2) relative to the median of each visit point (51.2  $\mu\text{mol/L}$  and 67.0  $\mu\text{mol/L}$  for V1 and V2, respectively). L/L, low V1 and low V2; L/H, low V1 and high V2; H/L, high V1 and low V2; H/H, high V1 and high V2. HR, hazard ratio; MACE, major adverse cardiovascular event; reHF, rehospitalization caused by heart failure; reMI, recurrent myocardial infarction. \* Adjusted for the variables with  $P < 0.1$  in the univariable models, including age, hypertension, diabetes, peripheral artery disease, chronic kidney disease, and previous history of stroke and MI, Killip II-IV, the Global Registry of Acute Coronary Events risk score, multiple vessels disease, percutaneous coronary intervention, and the peak value of cardiac troponin I and N-terminal pro B-type natriuretic peptide during hospitalization, as well as estimated glomerular filtration rate and left ventricular ejection fraction at V2.

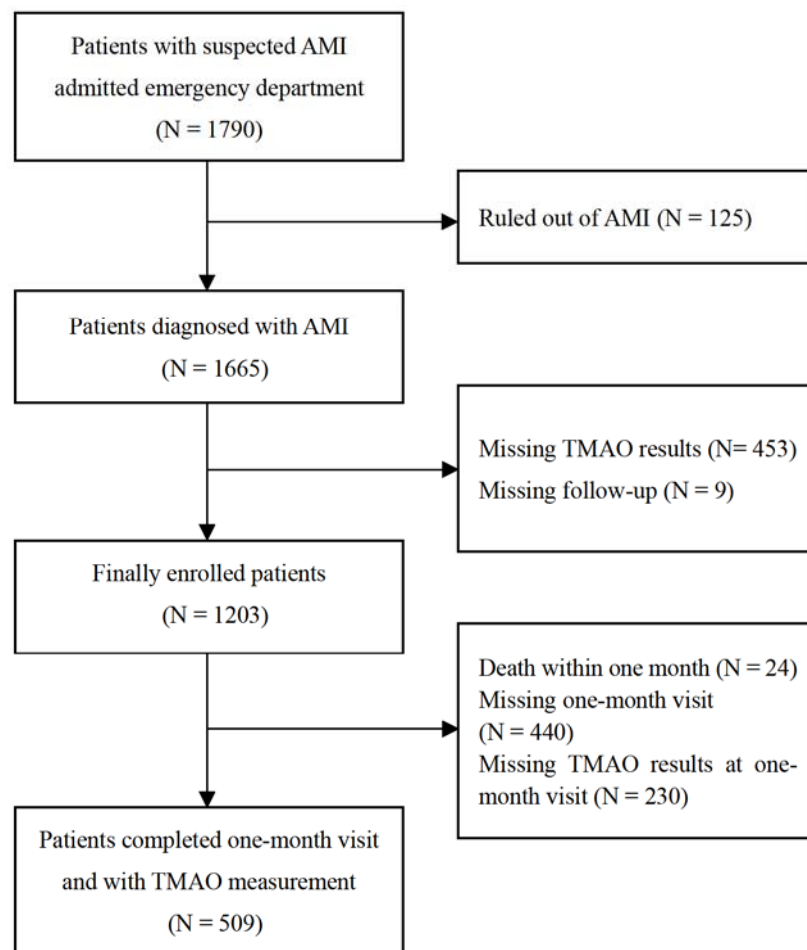

**Figure S1.** The flowchart of the patient selection process. AMI, acute myocardial infarction; TMAO, trimethylamine-N-oxide.

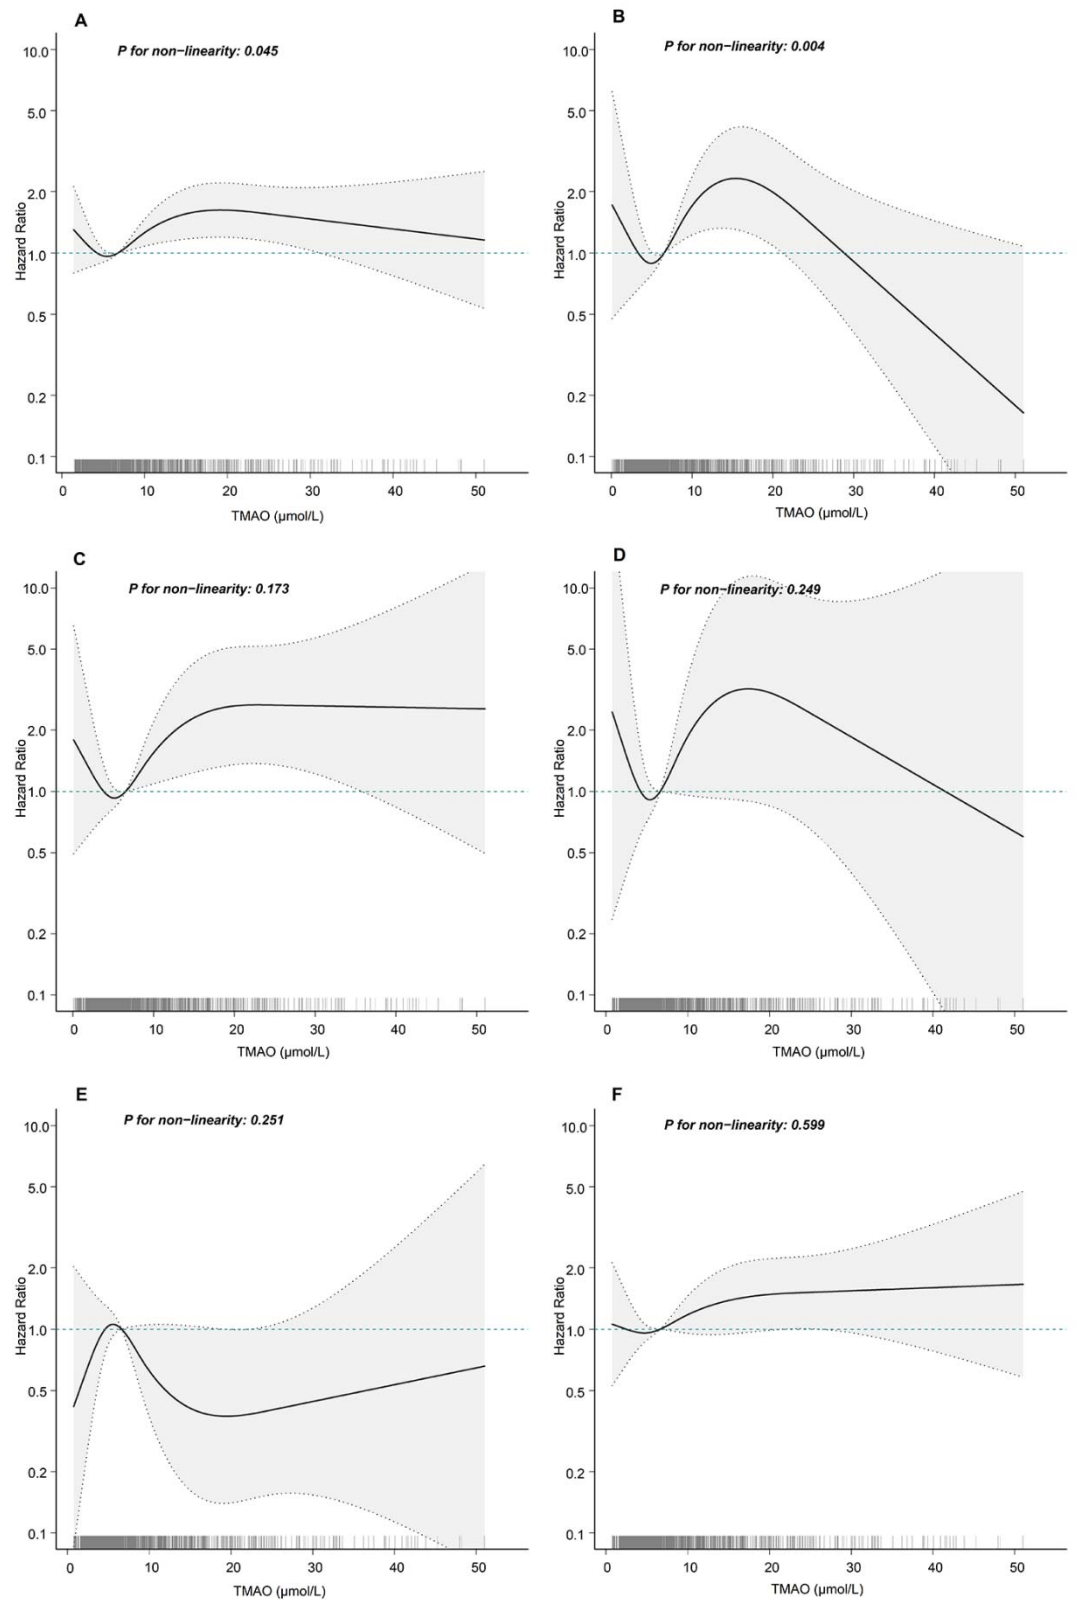

**Figure S2.** Continuous hazard ratios across TMAO levels at enrollment for major adverse cardiovascular event (A), all-cause death (B), myocardial infarction (C), rehospitalization caused by heart failure (D), stroke (E), and revascularization (F). TMAO, trimethylamine-N-oxide.

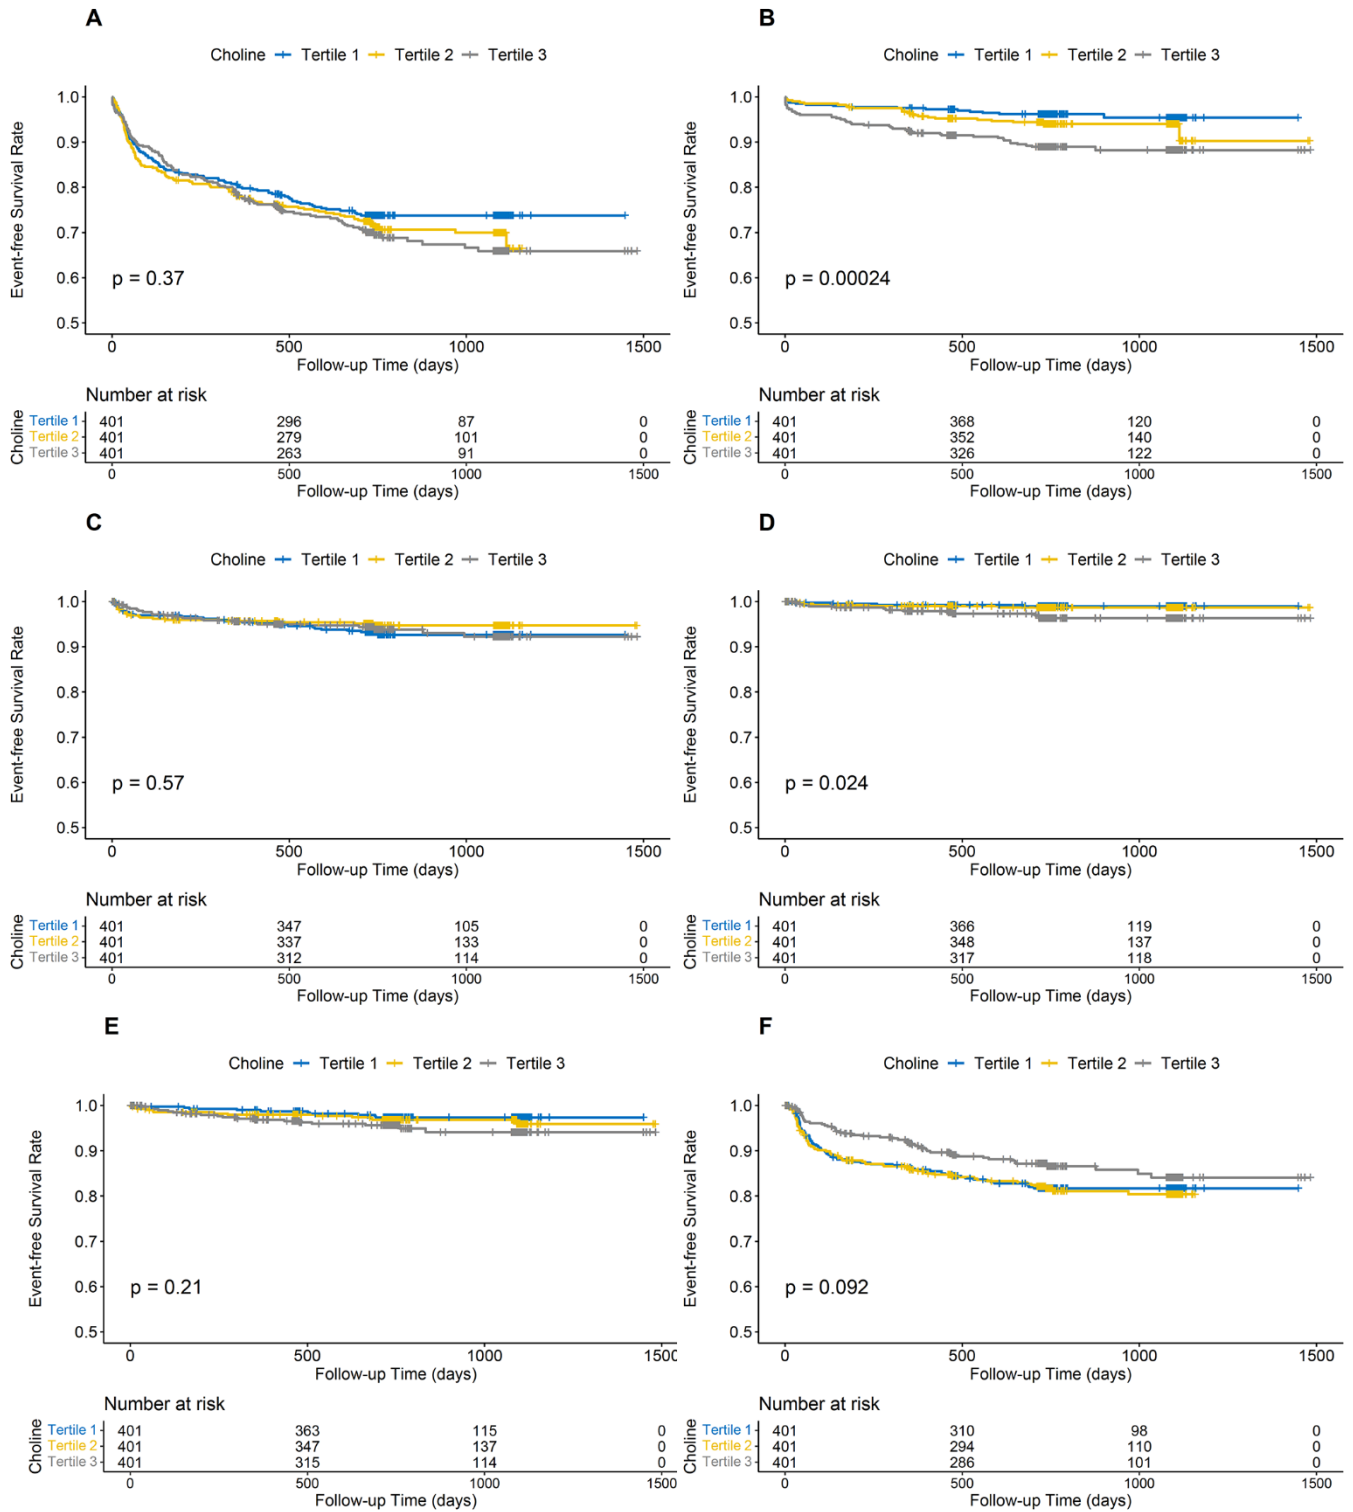

**Figure S3.** Kaplan-Meier curve for cumulative event-free survival in groups stratified by choline tertile levels at enrollment. **A:** major adverse cardiovascular event; **B:** all-cause death; **C:** myocardial infarction; **D:** rehospitalization caused by heart failure; **E:** stroke; **F:** revascularization.



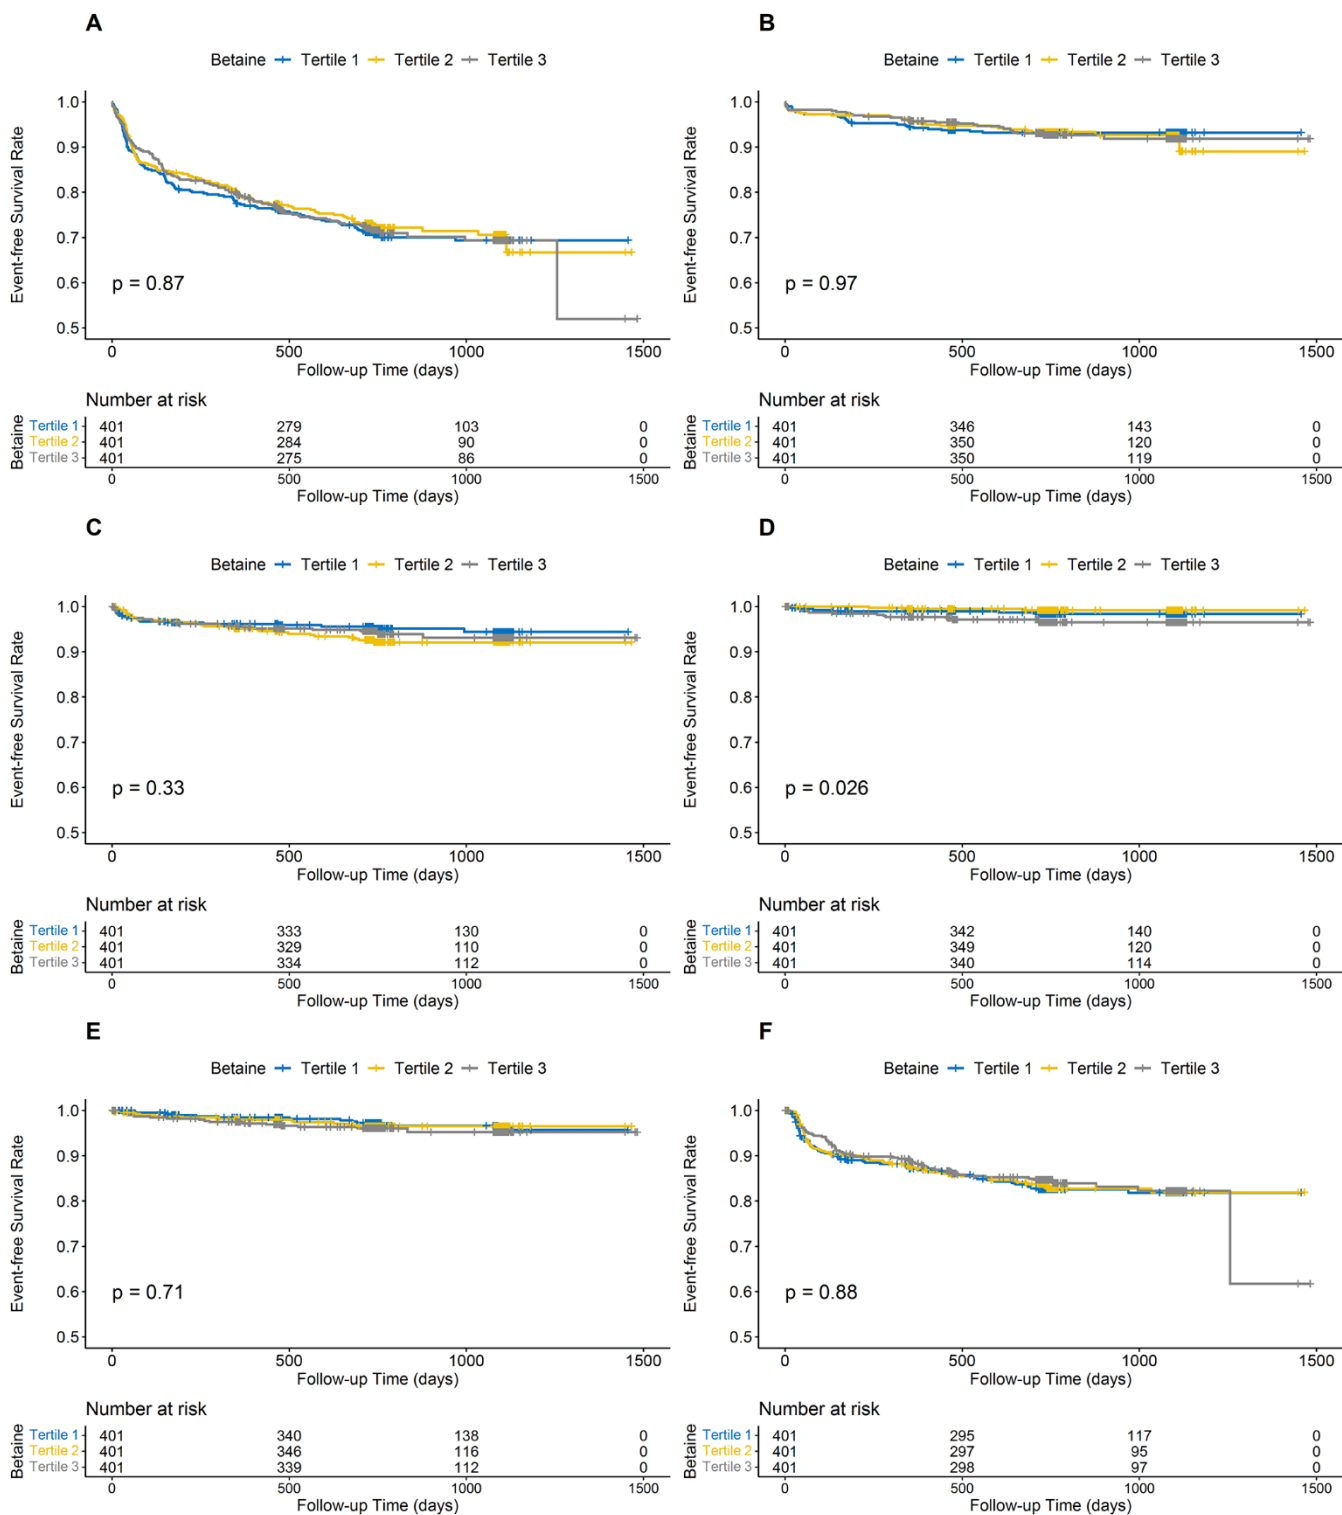

**Figure S4.** Kaplan-Meier curve for cumulative event-free survival in groups stratified by betaine tertile levels at enrollment. **A:** major adverse cardiovascular event; **B:** all-cause death; **C:** myocardial infarction; **D:** rehospitalization caused by heart failure; **E:** stroke; **F:** revascularization.

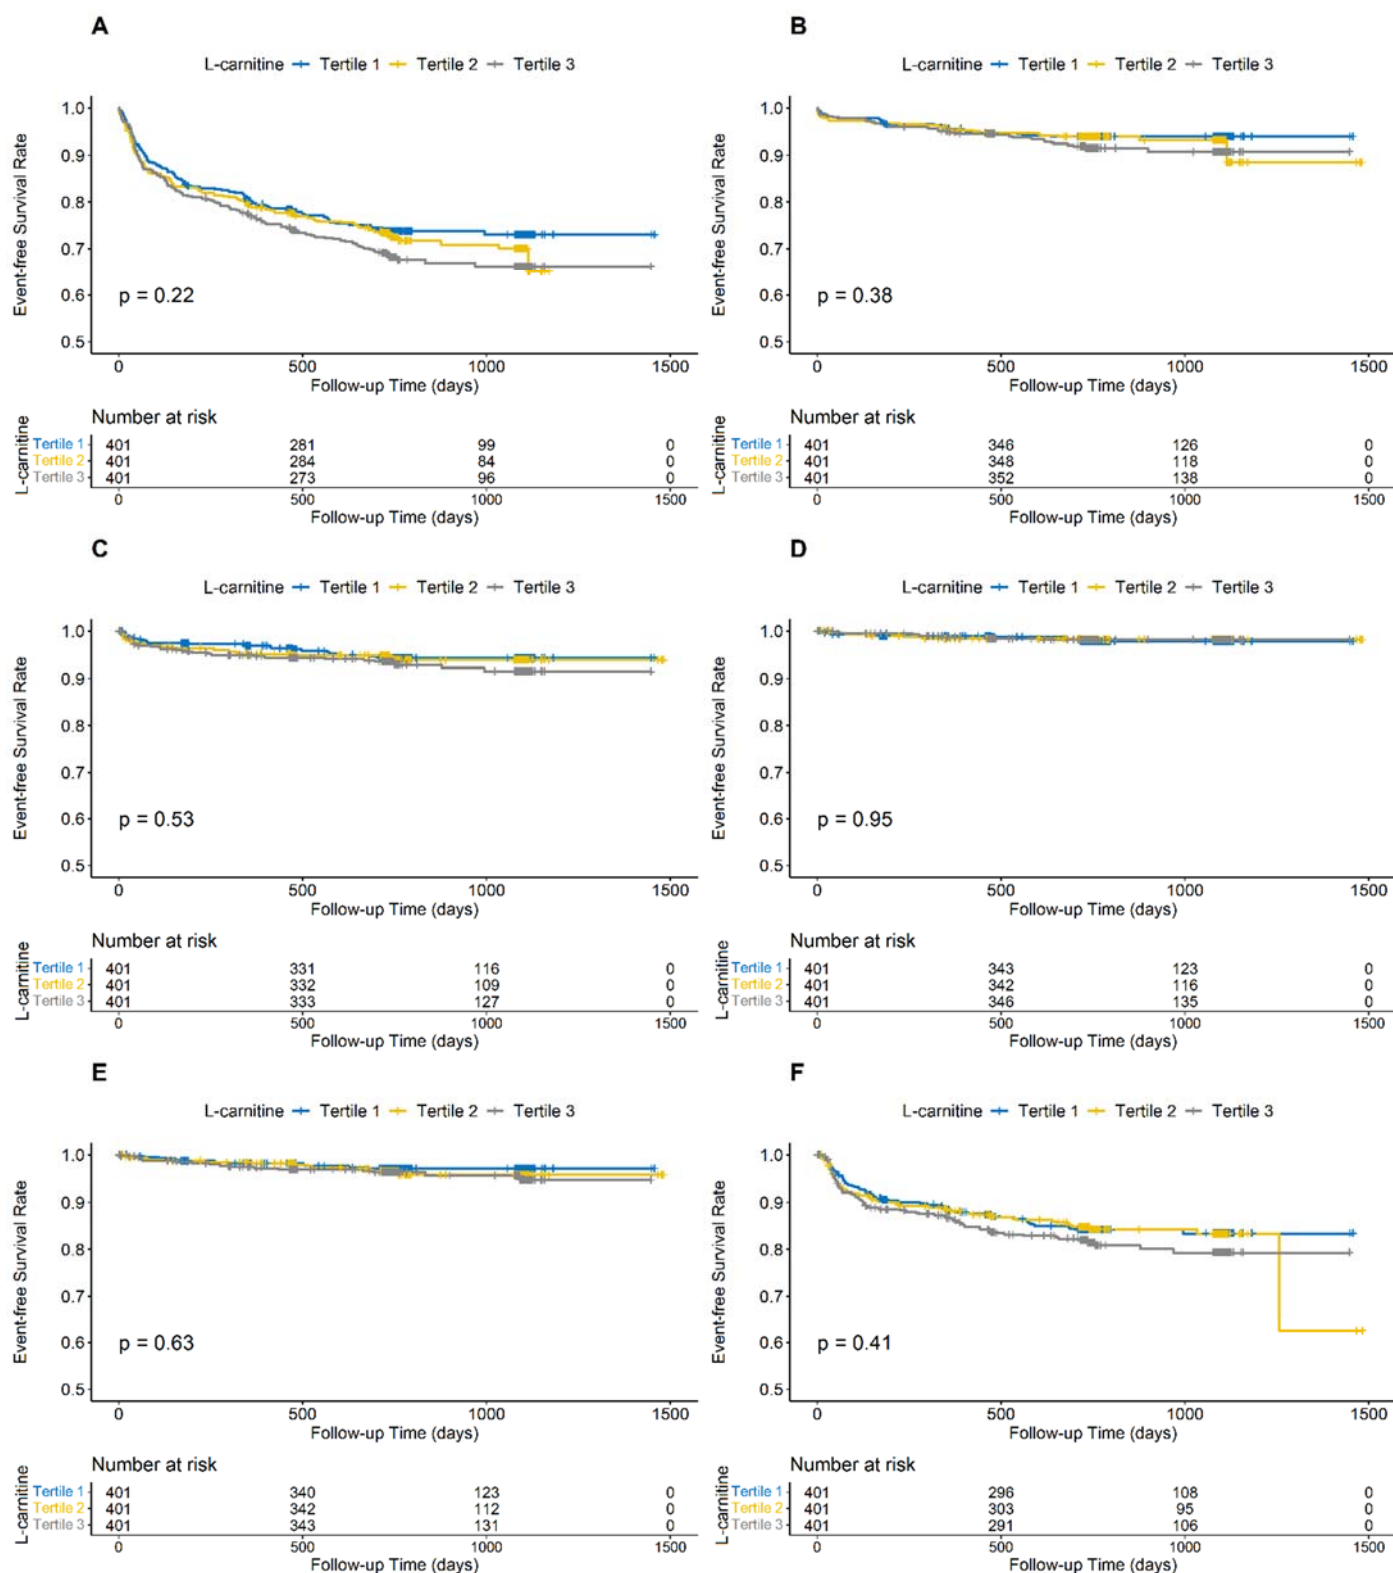

**Figure S5.** Kaplan-Meier curve for cumulative event-free survival in groups stratified by L-carnitine tertile levels at enrollment. **A:** major adverse cardiovascular event; **B:** all-cause death; **C:** myocardial infarction; **D:** rehospitalization caused by heart failure; **E:** stroke; **F:** revascularization.

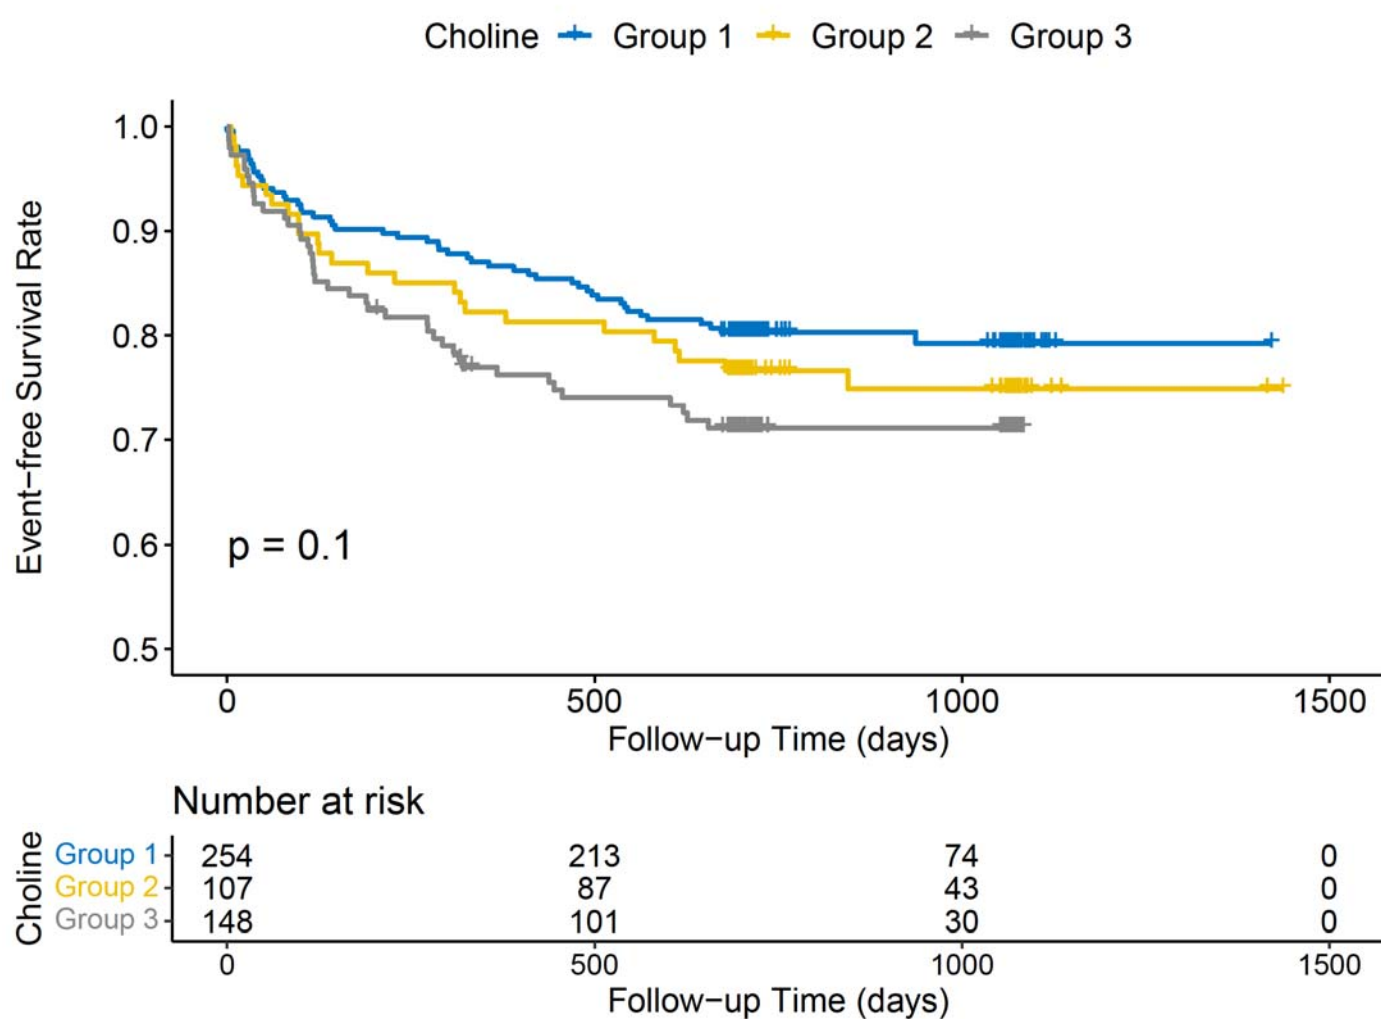

**Figure S6.** Kaplan-Meier curve for cumulative MACE-free survival in groups stratified by choline levels at enrollment (V1) and follow-up visit (V2). Patients were divided into three groups according to the respective median levels of choline at V1 and V2, namely Group 1 (patients with low choline levels at V1), Group 2 (patients with high choline levels at V1 and subsequently low levels at V2) and Group 3 (patients with high choline levels at V1 and V2). MACE, major adverse cardiovascular event.
